# Supplementary material for: Synthesis of polyvinylethylene glycols (PVEGs) via polyetherification of vinylethylene carbonate by synergistic catalysis
Source: Royal Society of Chemistry journal article supplement (doi:10.1039/d3cc05580a), 2024-01-01
Supplement: d3cc05580a1.pdf [file d3cc05580a1.pdf]

**Synthesis of polyvinylethylene glycols (PVEGs) via polyetherification  
of vinylethylene carbonate by synergistic catalysis**

Fan Yang, Minghang Wang and Yong Jian Zhang\*

Shanghai Key Laboratory for Molecular Engineering of Chiral Drugs, Frontiers  
Science Center for Transformative Molecules, and School of Chemistry and Chemical  
Engineering, Shanghai Jiao Tong University, 800 Dongchuan Road, Shanghai  
200240, P. R. China, Sichuan Research Institute, Shanghai Jiao Tong University,  
Chengdu 610042, P. R. China  
E-mail: [yjian@sjtu.edu.cn](mailto:yjian@sjtu.edu.cn)

## Contents

|                                                                                                         |     |
|---------------------------------------------------------------------------------------------------------|-----|
| 1. Materials and methods .....                                                                          | S3  |
| 2. General procedure for the synthesis of vinyl-functional polyvinylethylene glycols<br>.....           | S4  |
| 3. Typical synthesis of vinyl-functional thermoplastic polyurethane (VFTPU).....                        | S8  |
| 4. The procedure for thiol-ene click reaction.....                                                      | S9  |
| 5. MALDI-TOF MS spectrum of vinyl-functional polyvinylethylene glycols (PVEG)<br>.....                  | S9  |
| 6. Copies of $^1\text{H}$ NMR and $^{13}\text{C}$ NMR spectrums and GPC chromatograms of PVEGs<br>..... | S10 |
| 7. Characterization of vinyl-functional thermoplastic polyurethane (VFTPU).....                         | S27 |
| 8. Optimization of the detailed polymerization conditions <sup>[a]</sup> .....                          | S29 |

## 1. Materials and methods

### Materials

All the materials used in this study were purchased from commercial chemical suppliers (Sigma-Aldrich, Sinopharm Chemical reagent, Bidepharm, Titan, Macklin, and Meryer), unless otherwise stated. 2,2'-bis(diphenylphosphanyl)-1,1'-binaphthalene (BINAP, 99%), 1,4-bis(diphenylphosphanyl)butane (DPPB, 98%, Jiangsu Sinocompund Catalysts), 1,3-bis(diphenylphosphanyl)propane (DPPP, 98%, Jiangsu Sinocompund Catalysts), (oxybis(2,1-phenylene))bis(diphenylphosphane) (DPEphos, 98%, Jiangsu Sinocompund Catalysts), tri(furan-2-yl)phosphane (P(2-furanyl)<sub>3</sub>, 98%, Jiangsu Sinocompund Catalysts), triphenylphosphine (PPh<sub>3</sub>, 98%), tricyclohexylphosphane (PCy<sub>3</sub>, 98%, Jiangsu Sinocompund Catalysts), triphenylphosphite (P(OPh)<sub>3</sub>, 98%)

### Methods

<sup>1</sup>H, <sup>13</sup>C NMR spectra were recorded on a Bruker 400 MHz spectrometer at 25 °C. CDCl<sub>3</sub> (δ H = 7.26 ppm and δ C = 77.16 ppm) and DMSO-D<sub>6</sub> (δ H = 2.50 ppm and δ C = 39.52 ppm) were used as internal standards. The number average (M<sub>n</sub>), weight-average (M<sub>w</sub>) molecular weights and corresponding molecular weight distribution (M<sub>w</sub>/M<sub>n</sub>, PDI) were measured through Gel Permeation Chromatography (GPC) by using an EcoSEC HLC-8320 series with THF as eluent at 25 °C and a flow rate of 1.00 mL·min<sup>-1</sup> with a refractive index (RI) detector. All calibrations were performed by using polystyrene (PS) standards (Sigma-Aldrich; Mp, 500–8000000). MALDI-TOF mass spectrometry (MS) measurements were performed by using (E)-2-(3-(4-(tert-butyl)phenyl)-2-methylallylidene)malononitrile (DCTB) as a matrix on a Bruker Autoflex Max instrument. Hydroxyl value was measured according to ASTM D4274 standard by phthalic anhydride-pyridine method. Thermogravimetric analysis (TGA) (TG 209 F3, NETZSCH) was employed under a nitrogen atmosphere from 50 to 800 °C with a heating rate of 10 °C·min<sup>-1</sup>. The storage/loss modulus and tan δ as a function of temperature were measured on a TA Instrument DMA Q850 with the tensile mode. Stress-strain curves were measured at room temperature using an INSTRON 3365

universal testing machine with a stretching speed of  $50 \text{ mm}\cdot\text{min}^{-1}$ . For the tensile measurements, the specimens were cut into dog-bone shapes (width: 4 mm; gauge length: 20 mm; thickness 0.5mm).

## 2. General procedure for the synthesis of vinyl-functional polyvinylethylene glycols

**Synthetic of P2:** To an oven dried screw-cap reaction tube equipped with a magnetic stir bar, 4-Vinyl-1,3-dioxoian-2-one (VEC, **1**) (114.1 mg, 1.0 mmol) and 1,4-phenylenedimethanol (13.8 mg, 0.10 mmol) were added. Then,  $\text{Pd}_2(\text{dba})_3\cdot\text{CHCl}_3$  (1.5 mg, 0.15 mol% for **1**), DPEphos ligand (1.6 mg, 0.3 mol% for **1**) were added. The reaction tube was sealed with rubber-septum, then evacuated and backfilled with nitrogen (this process was repeated a total of three times).  $\text{Et}_3\text{B}$  (3  $\mu\text{L}$  of  $1 \text{ mol}\cdot\text{L}^{-1}$  in THF solution, 0.3 mol% for **1**) and anhydrous THF (1 mL) were added sequentially via syringe. The resulting mixture was stirred at  $10 \text{ }^\circ\text{C}$  for 2 h. The solvent was removed by rotary evaporation under vacuum. The remain catalysts were removed by short silica gel column to afford **P2** as a light-yellow oil (79.7 mg, 95% yield).

$^1\text{H}$  NMR (400MHz,  $\text{CDCl}_3$ ):  $\delta = 7.32$  (4H, ArH), 5.71 (1H,  $\text{CH}_2=\text{CH}$ ), 5.33 (2H,  $\text{CH}_2=\text{CH}$ ), 4.61/4.47 (4H,  $\text{ArCH}_2\text{O}$ ), 3.99 (1H,  $\text{OCH}(\text{CH}=\text{CH}_2) \text{CH}_2\text{O}$ ), 3.53 (2H,  $\text{OCH}(\text{CH}=\text{CH}_2) \text{CH}_2\text{O}$ ) ppm.  $^{13}\text{C}$  NMR (125MHz,  $\text{CDCl}_3$ ):  $\delta = 137.37$  (ArC), 135.77-134.99 ( $\text{CH}_2=\text{CH}$ ), 127.77 (ArC), 118.44-118.07 ( $\text{CH}_2=\text{CH}$ ), 82.89/80.20/81.04/80.47/79.59 ( $\text{OCH}(\text{CH}=\text{CH}_2)\text{CH}_2$ ), 71.90-71.24 ( $\text{OCH}(\text{CH}=\text{CH}_2)\text{CH}_2\text{O}$ ), 70.31 ( $\text{ArCH}_2\text{O}$ ), 65.33/65.16 ( $\text{CH}(\text{CH}=\text{CH}_2)\text{CH}_2\text{OH}$ ) ppm.

**Synthetic of P3:** General procedure was followed. 4-Vinyl-1,3-dioxoian-2-one (VEC, **1**) (228.2 mg, 2.0 mmol), 1,4-phenylenedimethanol (13.8 mg, 0.10 mmol),  $\text{Pd}_2(\text{dba})_3\cdot\text{CHCl}_3$  (3.1 mg, 0.15 mol% for **1**), DPEphos ligand (3.2 mg, 0.3 mol% for **1**),  $\text{Et}_3\text{B}$  (6 $\mu\text{L}$  of  $1 \text{ mol}\cdot\text{L}^{-1}$  in THF solution, 0.3 mol% for **1**) were used. **P3** was obtained as light-yellow oil (144.9 mg, 94% yield).

$^1\text{H}$  NMR (400MHz,  $\text{CDCl}_3$ ):  $\delta = 7.31$  (4H, ArH), 5.72 (1H,  $\text{CH}_2=\text{CH}$ ), 5.33 (2H,  $\text{CH}_2=\text{CH}$ ), 4.60/4.49 (4H,  $\text{ArCH}_2\text{O}$ ), 3.96 (1H,  $\text{OCH}(\text{CH}=\text{CH}_2)\text{CH}_2\text{O}$ ), 3.54 (2H,

OCH(CH=CH<sub>2</sub>)CH<sub>2</sub>O) ppm. <sup>13</sup>C NMR (125MHz, CDCl<sub>3</sub>): δ = 137.82 (ArC), 134.99-136.08 (CH<sub>2</sub>=CH), 128.31 (ArC), 118.47-118.08 (CH<sub>2</sub>=CH), 82.97/82.23/80.78/79.38 (OCH(CH=CH<sub>2</sub>)CH<sub>2</sub>O), 71.62-71.20 (CH(CH=CH<sub>2</sub>)CH<sub>2</sub>OCH), 70.36 (ArCH<sub>2</sub>O), 65.36/65.15 (CH(CH=CH<sub>2</sub>)CH<sub>2</sub>OH) ppm.

**Synthetic of P4:** General procedure was followed. 4-Vinyl-1,3-dioxoian-2-one (VEC, **1**) (456.4 mg, 4.0 mmol), 1,4-phenylenedimethanol (13.8 mg, 0.10 mmol), Pd<sub>2</sub>(dba)<sub>3</sub>·CHCl<sub>3</sub> (6.2 mg, 0.15 mol% for **1**), DPEphos ligand (6.4 mg, 0.3 mol% for **1**), Et<sub>3</sub>B (12μL of 1 mol·L<sup>-1</sup> in THF solution, 0.3 mol% for **1**) were used. **P4** was obtained as light-yellow oil (279.8 mg, 95% yield).

<sup>1</sup>H NMR (400MHz, CDCl<sub>3</sub>): δ = 7.30 (4H, ArH), 5.74 (1H, CH<sub>2</sub>=CH), 5.21 (2H, CH<sub>2</sub>=CH), 4.60/4.49 (4H, ArCH<sub>2</sub>O), 3.95 (1H, OCH(CH=CH<sub>2</sub>)CH<sub>2</sub>O), 3.49 (2H, OCH(CH=CH<sub>2</sub>)CH<sub>2</sub>O) ppm. <sup>13</sup>C NMR (125MHz, CDCl<sub>3</sub>): δ = 137.80 (ArC), 136.07-134.43 (CH<sub>2</sub>=CH), 127.61 (ArC), 118.39-117.64 (CH<sub>2</sub>=CH), 82.93/82.18/80.65/79.34 (OCH(CH=CH<sub>2</sub>)CH<sub>2</sub>O), 71.91-71.22 (CH(CH=CH<sub>2</sub>)CH<sub>2</sub>OCH), 70.34 (ArCH<sub>2</sub>O), 65.31/65.11 (CH(CH=CH<sub>2</sub>)CH<sub>2</sub>OH) ppm.

**Synthetic of P5:** General procedure was followed. 4-Vinyl-1,3-dioxoian-2-one (VEC, **1**) (912.8 mg, 8.0 mmol), 1,4-phenylenedimethanol (13.8 mg, 0.10 mmol), Pd<sub>2</sub>(dba)<sub>3</sub>·CHCl<sub>3</sub> (12.4 mg, 0.15 mol% for **1**), DPEphos ligand (12.9 mg, 0.3 mol% for **1**), Et<sub>3</sub>B (24μL of 1 mol·L<sup>-1</sup> in THF solution, 0.3 mol% for **1**) were used. **P5** was obtained as light-yellow oil (534.9 mg, 93% yield).

<sup>1</sup>H NMR (400MHz, CDCl<sub>3</sub>): δ = 7.32 (4H, ArH), 5.74 (1H, CH<sub>2</sub>=CH), 5.21 (2H, CH<sub>2</sub>=CH), 4.60/4.49 (4H, ArCH<sub>2</sub>O), 3.93 (1H, OCH(CH=CH<sub>2</sub>)CH<sub>2</sub>O), 3.50 (2H, OCH(CH=CH<sub>2</sub>)CH<sub>2</sub>O) ppm. <sup>13</sup>C NMR (125MHz, CDCl<sub>3</sub>): δ = 137.91 (ArC), 136.17-134.96 (CH<sub>2</sub>=CH), 127.60 (ArC), 118.14-117.60 (CH<sub>2</sub>=CH), 83.04/82.24/80.67/79.34 (OCH(CH=CH<sub>2</sub>)CH<sub>2</sub>O), 71.97-71.65 (CH(CH=CH<sub>2</sub>)CH<sub>2</sub>OCH), 71.19 (ArCH<sub>2</sub>O), 65.39/65.20 (CH(CH=CH<sub>2</sub>)CH<sub>2</sub>OH) ppm.

**Synthetic of P6:** General procedure was followed. 4-Vinyl-1,3-dioxoian-2-one (VEC, **1**) (1825.6 mg, 16.0 mmol), 1,4-phenylenedimethanol (13.8 mg, 0.10mmol), Pd<sub>2</sub>(dba)<sub>3</sub>·CHCl<sub>3</sub> (24.8 mg, 0.15 mol% for **1**), DPEphos ligand (25.8 mg, 0.3 mol% for

**1**), Et<sub>3</sub>B (48 μL of 1 mol·L<sup>-1</sup> in THF solution, 0.3 mol% for **1**) were used. **P6** was obtained as light-yellow oil (1045.7 mg, 92% yield).

<sup>1</sup>H NMR (400MHz, CDCl<sub>3</sub>): δ = 7.30 (4H, ArH), 5.74 (1H, CH<sub>2</sub>=CH), 5.21 (2H, CH<sub>2</sub>=CH), 4.60/4.49 (4H, ArCH<sub>2</sub>O), 3.91 (1H, OCH(CH=CH<sub>2</sub>) CH<sub>2</sub>O), 3.49 (2H, OCH(CH=CH<sub>2</sub>) CH<sub>2</sub>O) ppm. <sup>13</sup>C NMR (125MHz, CDCl<sub>3</sub>): δ = 137.53 (ArC), 136.18-134.97 (CH<sub>2</sub>=CH), 127.65 (ArC), 118.53-117.58 (CH<sub>2</sub>=CH), 83.00/82.22/80.67/79.36 (OCH(CH=CH<sub>2</sub>)CH<sub>2</sub>O), 71.99-71.66 (CH(CH=CH<sub>2</sub>)CH<sub>2</sub>OCH), 71.22 (ArCH<sub>2</sub>O), 65.38/65.17 (CH(CH=CH<sub>2</sub>)CH<sub>2</sub>OH) ppm.

**Synthetic of P7:** General procedure was followed. 4-Vinyl-1,3-dioxoian-2-one (VEC, **1**) (456.4 mg, 4.0 mmol), cyclohexane-1,4-diyldimethanol (14.4 mg, 0.10 mmol), Pd<sub>2</sub>(dba)<sub>3</sub>·CHCl<sub>3</sub> (6.2 mg, 0.15 mol% for **1**), DPEphos ligand (6.4 mg, 0.3 mol% for **1**), Et<sub>3</sub>B (12 μL of 1 mol·L<sup>-1</sup> in THF solution, 0.3 mol% for **1**) were used. **P7** was obtained as light-yellow oil (280.3 mg, 95% yield).

<sup>1</sup>H NMR (400MHz, CDCl<sub>3</sub>): δ = 5.74 (1H, CH<sub>2</sub>=CH), 5.22 (2H, CH<sub>2</sub>=CH), 3.95 (1H, OCH(CH=CH<sub>2</sub>)CH<sub>2</sub>), 3.58-3.43 (H, (CH<sub>2</sub>)<sub>2</sub>CCH<sub>2</sub>O & CH(CH=CH<sub>2</sub>) CH<sub>2</sub>O), 1.81/1.50/1.35/0.91 (H, cyclohexane) ppm. <sup>13</sup>C NMR (125MHz, CDCl<sub>3</sub>): δ = 136.60-134.97 (CH<sub>2</sub>=CH), 118.54-117.71 (CH<sub>2</sub>=CH), 83.02/82.25/80.66 (OCH(CH=CH<sub>2</sub>) CH<sub>2</sub>), 71.88-71.17 ((CH<sub>2</sub>)<sub>2</sub>CCH<sub>2</sub>O & CH(CH=CH<sub>2</sub>)CH<sub>2</sub>O), 65.33/65.13 (CH(CH=CH<sub>2</sub>)CH<sub>2</sub>OH), 38.68/35.61 (cyclohexane, (CH<sub>2</sub>)<sub>2</sub>C), 29.45/25.84 (cyclohexane, (CH<sub>2</sub>)<sub>2</sub>C) ppm.

**Synthetic of P8:** General procedure was followed. 4-Vinyl-1,3-dioxoian-2-one (VEC, **1**) (456.4 mg, 4.0 mmol), butane-1,4-diol (9.0 mg, 0.10 mmol), Pd<sub>2</sub>(dba)<sub>3</sub>·CHCl<sub>3</sub> (6.2 mg, 0.15 mol% for **1**), DPEphos ligand (6.4 mg, 0.3 mol% for **1**), Et<sub>3</sub>B (12 μL of 1 mol·L<sup>-1</sup> in THF solution, 0.3 mol% for **1**) were used. **P8** was obtained as light-yellow oil (269.4 mg, 93% yield).

<sup>1</sup>H NMR (400MHz, CDCl<sub>3</sub>): δ = 5.74 (1H, CH<sub>2</sub>=CH), 5.21 (2H, CH<sub>2</sub>=CH), 3.93 (1H, OCH(CH=CH<sub>2</sub>)CH<sub>2</sub>O), 3.58-3.42 (H, CH(CH=CH<sub>2</sub>)CH<sub>2</sub>O & CH<sub>2</sub>CH<sub>2</sub>OCH(CH=CH<sub>2</sub>)), 1.62 (2H, CH<sub>2</sub>CH<sub>2</sub>OCH(CH=CH<sub>2</sub>)) ppm. <sup>13</sup>C NMR (125MHz, CDCl<sub>3</sub>): δ = 136.51-135.17 (CH<sub>2</sub>=CH), 118.16-117.66 (CH<sub>2</sub>=CH),

83.10/82.31/80.67/80.10 (OCH(CH=CH<sub>2</sub>)CH<sub>2</sub>), 71.96-71.63 (OCH(CH=CH<sub>2</sub>)CH<sub>2</sub>O), 68.85 (CH<sub>2</sub>CH<sub>2</sub>OCH(CH=CH<sub>2</sub>)), 65.37 (OCH(CH=CH<sub>2</sub>)CH<sub>2</sub>OH), 29.67/26.57 (CH<sub>2</sub>CH<sub>2</sub>OCH(CH=CH<sub>2</sub>) ppm.

**Synthetic of P9:** General procedure was followed. 4-Vinyl-1,3-dioxoian-2-one (VEC, **1**) (456.4 mg, 4.0 mmol), 2,2'-oxybis(ethan-1-ol) (10.6 mg, 0.10 mmol), Pd<sub>2</sub>(dba)<sub>3</sub>·CHCl<sub>3</sub> (6.2 mg, 0.15 mol% for **1**), DPEphos ligand (6.4 mg, 0.3 mol% for **1**), Et<sub>3</sub>B (12 μL of 1 mol·L<sup>-1</sup> in THF solution, 0.3 mol% for **1**) were used. **P9** was obtained as light-yellow oil (262.2 mg, 90% yield).

<sup>1</sup>H NMR (400MHz, CDCl<sub>3</sub>): δ = 5.72 (1H, CH<sub>2</sub>=CH), 5.21 (2H, CH<sub>2</sub>=CH), 3.94 (1H, OCH(CH=CH<sub>2</sub>)CH<sub>2</sub>O), 3.58-3.43 (H, CH(CH=CH<sub>2</sub>)CH<sub>2</sub>O & OCH<sub>2</sub>CH<sub>2</sub>OCH & OCH<sub>2</sub>CH<sub>2</sub>OCH) ppm. <sup>13</sup>C NMR (125MHz, CDCl<sub>3</sub>): δ = 136.13-135.17 (CH<sub>2</sub>=CH), 118.58-117.75 (CH<sub>2</sub>=CH), 83.04/82.26/80.66 (OCH(CH=CH<sub>2</sub>)CH<sub>2</sub>), 71.96-71.63 (CH(CH=CH<sub>2</sub>)CH<sub>2</sub>O), 71.17 (CH<sub>2</sub>CH<sub>2</sub>OCH(CH=CH<sub>2</sub>)), 70.59 (CH<sub>2</sub>CH<sub>2</sub>OCH(CH=CH<sub>2</sub>)), 68.31/65.34 (CH(CH=CH<sub>2</sub>)CH<sub>2</sub>OH) ppm.

**Synthetic of P10:** General procedure was followed. 4-Vinyl-1,3-dioxoian-2-one (VEC, **1**) (456.4 mg, 4.0 mmol), tert-butyl bis(2-hydroxyethyl)carbamate (20.5 mg, 0.10mmol), Pd<sub>2</sub>(dba)<sub>3</sub>·CHCl<sub>3</sub> (6.2 mg, 0.15 mol% for **1**), DPEphos ligand (6.4 mg, 0.3 mol% for **1**), Et<sub>3</sub>B (12 μL of 1 mol·L<sup>-1</sup> in THF solution, 0.3 mol% for **1**) were used. **P10** was obtained as light-yellow liquid (259.1 mg, 86% yield).

<sup>1</sup>H NMR (400MHz, CDCl<sub>3</sub>): δ = 5.74 (1H, CH<sub>2</sub>=CH), 5.22 (2H, CH<sub>2</sub>=CH), 3.93 (1H, OCH(CH=CH<sub>2</sub>)CH<sub>2</sub>O), 3.57-3.42 (H, OCH(CH=CH<sub>2</sub>)CH<sub>2</sub>O & NCH<sub>2</sub>CH<sub>2</sub>OCH & NCH<sub>2</sub>CH<sub>2</sub>OCH), 1.43 (H, Boc) ppm. <sup>13</sup>C NMR (125MHz, CDCl<sub>3</sub>): δ = 155.39 (Boc), 136.17-134.96 (CH<sub>2</sub>=CH), 118.50-117.72 (CH<sub>2</sub>=CH), 82.99/82.21/80.66/79.31 (OCH(CH=CH<sub>2</sub>)CH<sub>2</sub>), 79.31 (Boc), 71.95-71.19 (CH(CH=CH<sub>2</sub>)CH<sub>2</sub>O), 67.33 (NCH<sub>2</sub>CH<sub>2</sub>OCH), 65.36/65.15 (CH(CH=CH<sub>2</sub>)CH<sub>2</sub>OH), 53.43/47.97 (NCH<sub>2</sub>CH<sub>2</sub>OCH), 28.46 (Boc) ppm.

**Synthetic of P11:** General procedure was followed. 4-Vinyl-1,3-dioxoian-2-one (VEC, **1**) (456.4 mg, 4.0 mmol), 2-methylenepropane-1,3-diol (8.8 mg, 0.10mmol), Pd<sub>2</sub>(dba)<sub>3</sub>·CHCl<sub>3</sub> (6.2 mg, 0.15 mol% for **1**), DPEphos ligand (6.4 mg, 0.3 mol% for **1**),

Et<sub>3</sub>B (12 μL of 1 mol·L<sup>-1</sup> in THF solution, 0.012 mmol, 0.3 mol% for **1**) were used. **P11** was obtained as light-yellow oil (275.0 mg, 95% yield).

<sup>1</sup>H NMR (400MHz, CDCl<sub>3</sub>): δ = 5.74 (1H, CH<sub>2</sub>=CH), 5.22 (2H, CH<sub>2</sub>=CH), 4.06-3.94 (H, CCH<sub>2</sub>OCH(CH=CH<sub>2</sub>) & CH<sub>2</sub>OCH(CH=CH<sub>2</sub>)CH<sub>2</sub>), 3.57-3.42 (H, CH(CH=CH<sub>2</sub>)CH<sub>2</sub>O & C(CH<sub>2</sub>)CH<sub>2</sub>O) ppm. <sup>13</sup>C NMR (125MHz, CDCl<sub>3</sub>): δ = 143.06 (C(CH<sub>2</sub>)CH<sub>2</sub>), 136.06-134.98 (CH<sub>2</sub>=CH), 118.50-117.56 (CH<sub>2</sub>=CH), 116.04 (C(CH<sub>2</sub>)CH<sub>2</sub>O), 82.98/82.21/80.65/79.31 (OCH(CH=CH<sub>2</sub>)CH<sub>2</sub>O), 71.96-71.19 (OCH(CH=CH<sub>2</sub>)CH<sub>2</sub>O), 69.38 (C(CH<sub>2</sub>)CH<sub>2</sub>OCH), 65.33 (CH(CH=CH<sub>2</sub>)CH<sub>2</sub>OH) ppm.

**Synthetic of P12:** General procedure was followed. 4-Vinyl-1,3-dioxoian-2-one (VEC, **1**) (456.4 mg, 4.0 mmol), (Z)-but-2-ene-1,4-diol (8.8 mg, 0.10 mmol), Pd<sub>2</sub>(dba)<sub>3</sub>·CHCl<sub>3</sub> (6.2 mg, 0.15 mol% for **1**), DPEphos ligand (6.4 mg, 0.3 mol% for **1**), Et<sub>3</sub>B (12 μL of 1 mol·L<sup>-1</sup> in THF solution, 0.3 mol% for **1**) were used. **P12** was obtained as light-yellow oil (277.9 mg, 96% yield).

<sup>1</sup>H NMR (400MHz, CDCl<sub>3</sub>): δ = 5.74 (H, CH<sub>2</sub>=CH & CHCH<sub>2</sub>OCH(CH=CH<sub>2</sub>)), 5.22 (2H, CH<sub>2</sub>=CH), 4.08-3.93 (H, CHCH<sub>2</sub>OCH(CH=CH<sub>2</sub>) & CHCH<sub>2</sub>OCH(CH=CH<sub>2</sub>)), 3.50 (2H, CH(CH=CH<sub>2</sub>)CH<sub>2</sub>O) ppm. <sup>13</sup>C NMR (125MHz, CDCl<sub>3</sub>): δ = 136.02-134.94 (CH<sub>2</sub>=CH), 129.33 (CHCH<sub>2</sub>OCH(CH=CH<sub>2</sub>)), 118.60-117.77 (CH<sub>2</sub>=CH), 83.05/82.28/80.66/79.59 (OCH(CH=CH<sub>2</sub>)CH<sub>2</sub>O), 71.87-71.16 (OCH(CH=CH<sub>2</sub>)CH<sub>2</sub>O), 65.35 (CHCH<sub>2</sub>OCH(CH=CH<sub>2</sub>)), 64.50 (CH(CH=CH<sub>2</sub>)CH<sub>2</sub>OH) ppm.

### 3. Typical synthesis of vinyl-functional thermoplastic polyurethane (VFTPU)

The polymer was synthesized by the traditional two-step solution polymerization. Briefly, the stoichiometry of **P4**/MDI/1,4-butanediol was 1:2:1. Before the reaction, **P4** (1.0089 g, 0.5 mmol) was evacuated at 70 °C for 2 h to remove moisture. MDI (0.2502 g, 1.0 mmol) was then added into the flask dropwise, followed by the addition of DBTDL (0.1304 g, 1 wt%) as a catalyst. THF was added once the viscosity of the reaction solution increased. The prepolymer reaction was carried out for 3 h at 70 °C. Afterward, 1,4-butanediol (0.0451 g, 0.5 mmol) as the chain extender was added into the solution and stirred for another 2h at 70°C under nitrogen protection. The resulting



polymer was washed by methanol for further purification, then dried.

#### 4. The procedure for thiol-ene click reaction

To test the reactivity of the allyl component toward 1-dodecanethiol, a model reaction was carried out. In order to ensure the complete reaction of vinyl-functional groups in PVEG **P4**, 1-dodecanethiol was added according to the stoichiometry 1:5 of vinyl/sulphydryl ( $C=C/-SH$ ). In a scintillation vial, 1-dodecanethiol (0.6072 g, 30 equiv), PVEG **P4** (0.2017 g, 1 equiv), and 2-Hydroxy-2-methylpropiophenone as a photoinitiator (0.0081 g, 1 wt%) were mixed well. Then, the samples were irradiated with UV lamps ( $365\text{ nm}$ ,  $300\text{mW}\cdot\text{cm}^{-2}$ ) for 60 seconds. Finally, the sample was removed by short silica gel column to afford thioether-functional polyglycol (TEFPG). The TEFPG were tested by  $^1\text{H NMR}$ .

#### 5. MALDI-TOF MS spectrum of vinyl-functional polyvinylethylene glycols (PVEG)

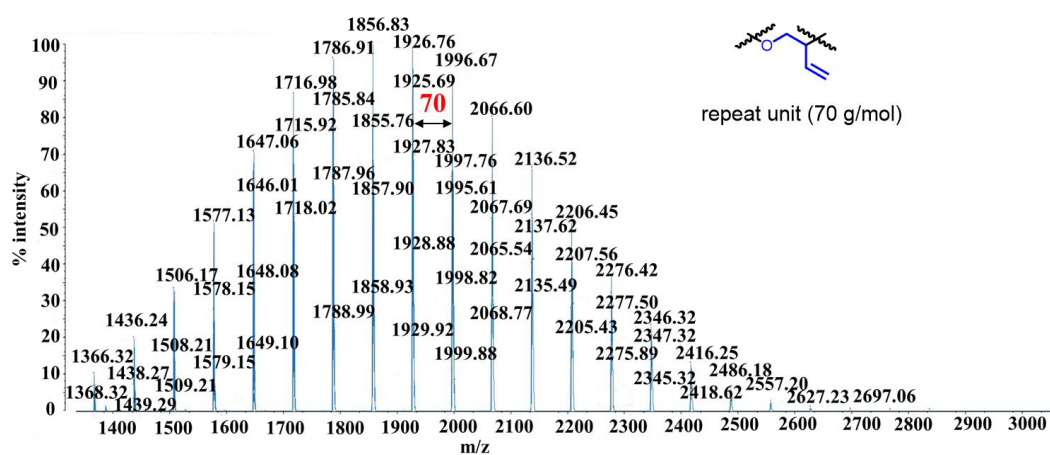

Figure S1. MALDI-TOF MS spectrum of PVEG (**P4**).

## 6. Copies of $^1\text{H}$ NMR and $^{13}\text{C}$ NMR spectrums and GPC chromatograms of

### PVEGs

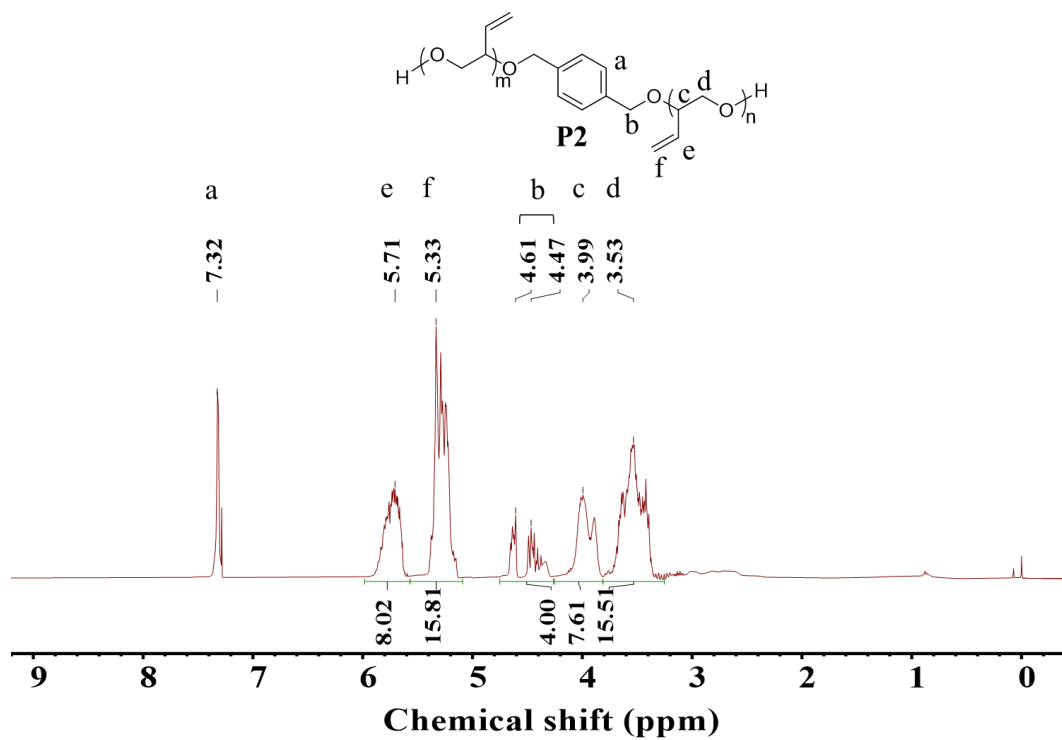

Figure S2.  $^1\text{H}$  NMR spectrum of P2 in  $\text{CDCl}_3$  (400 MHz).

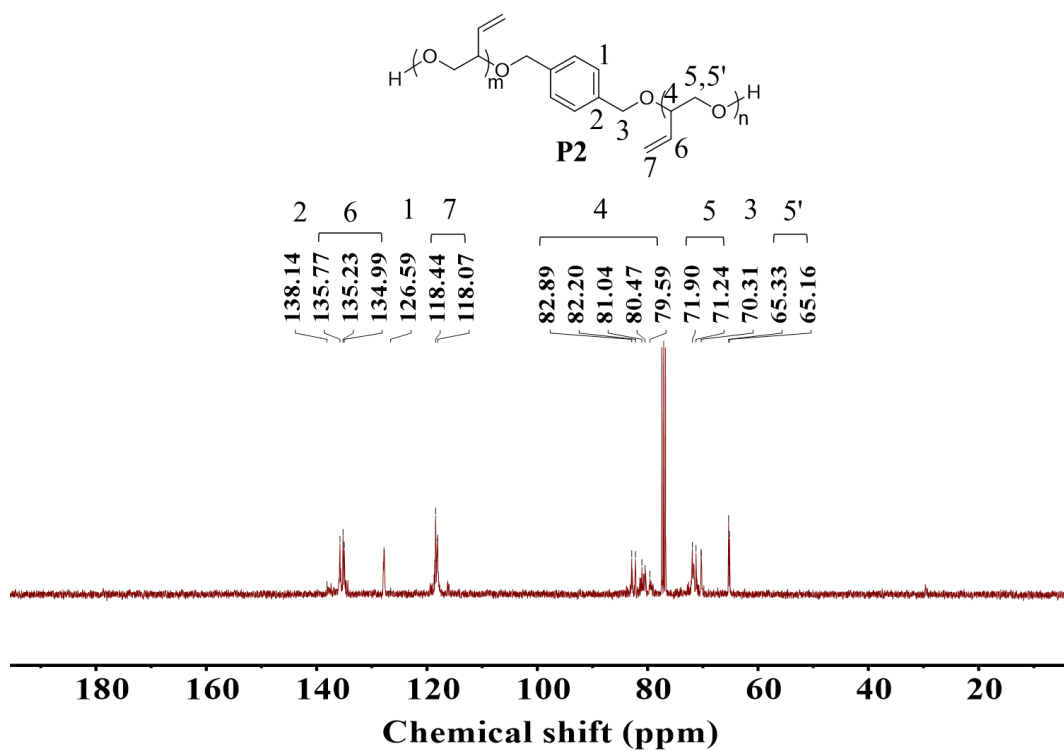

Figure S3.  $^{13}\text{C}$  NMR spectrum of P2 in  $\text{CDCl}_3$  (125 MHz).

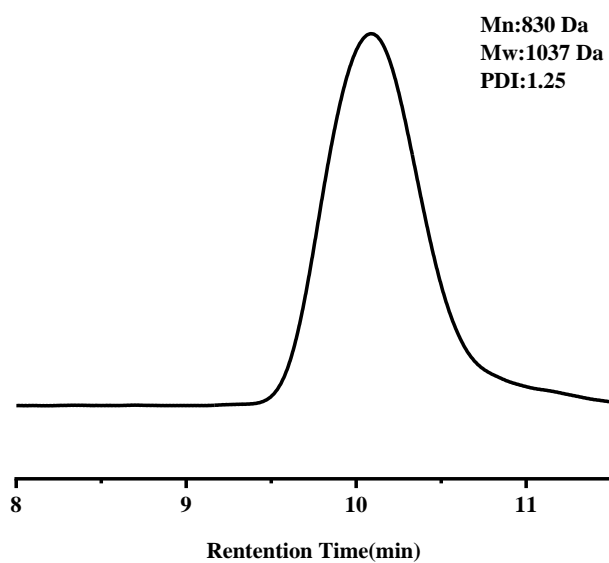

Figure S4. GPC chromatogram of P2.

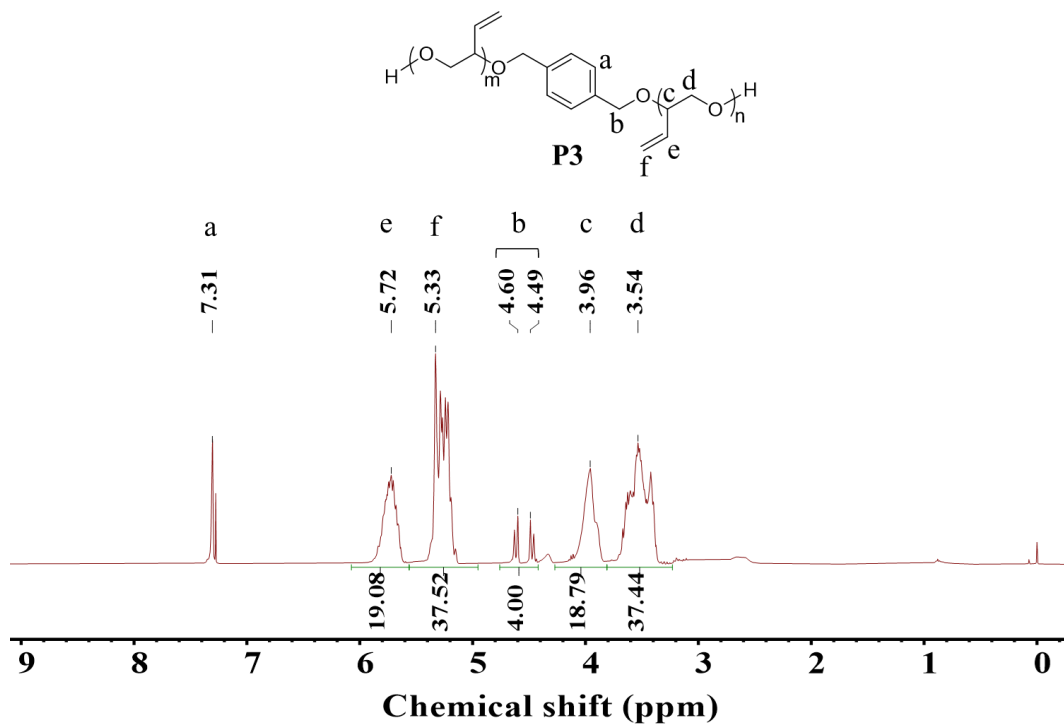

Figure S5. <sup>1</sup>H NMR spectrum of P3 in CDCl<sub>3</sub> (400 MHz).

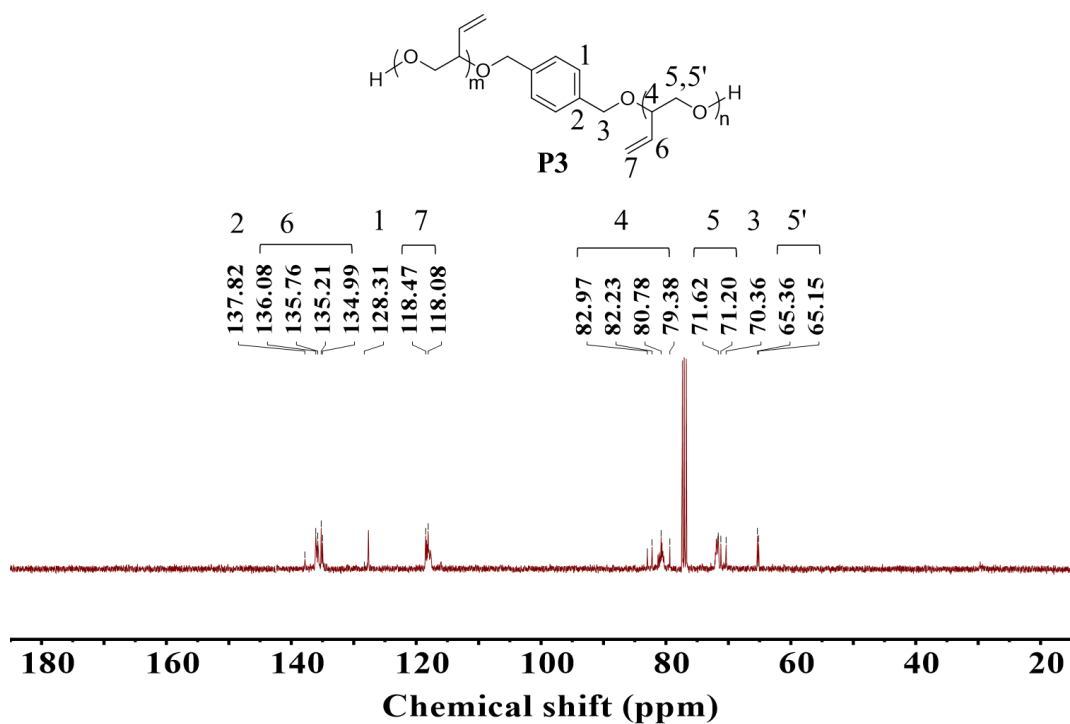

Figure S6. <sup>13</sup>C NMR spectrum of P3 in CDCl<sub>3</sub> (125 MHz).

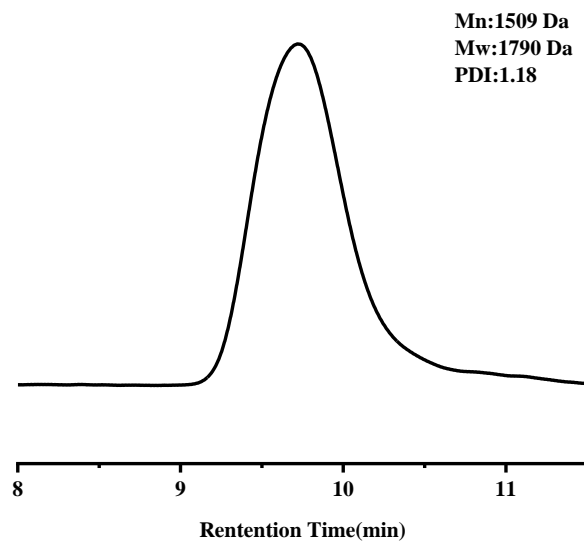

Figure S7. GPC chromatogram of P3.

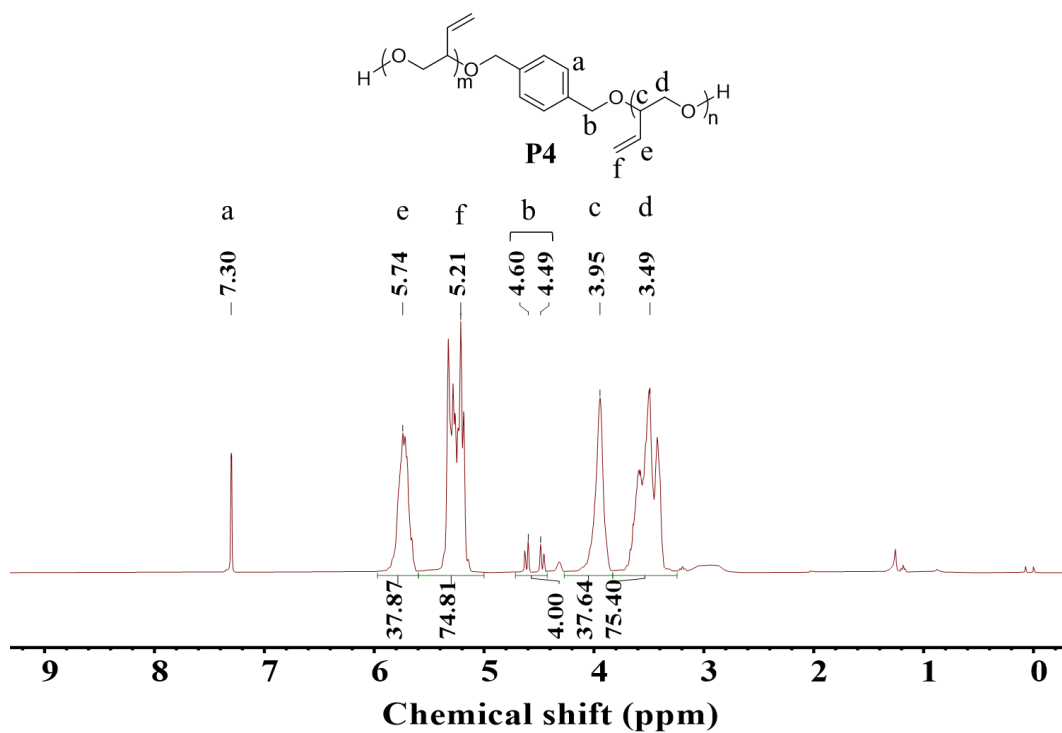

Figure S8.  $^1\text{H}$  NMR spectrum of P4 in  $\text{CDCl}_3$  (400 MHz).

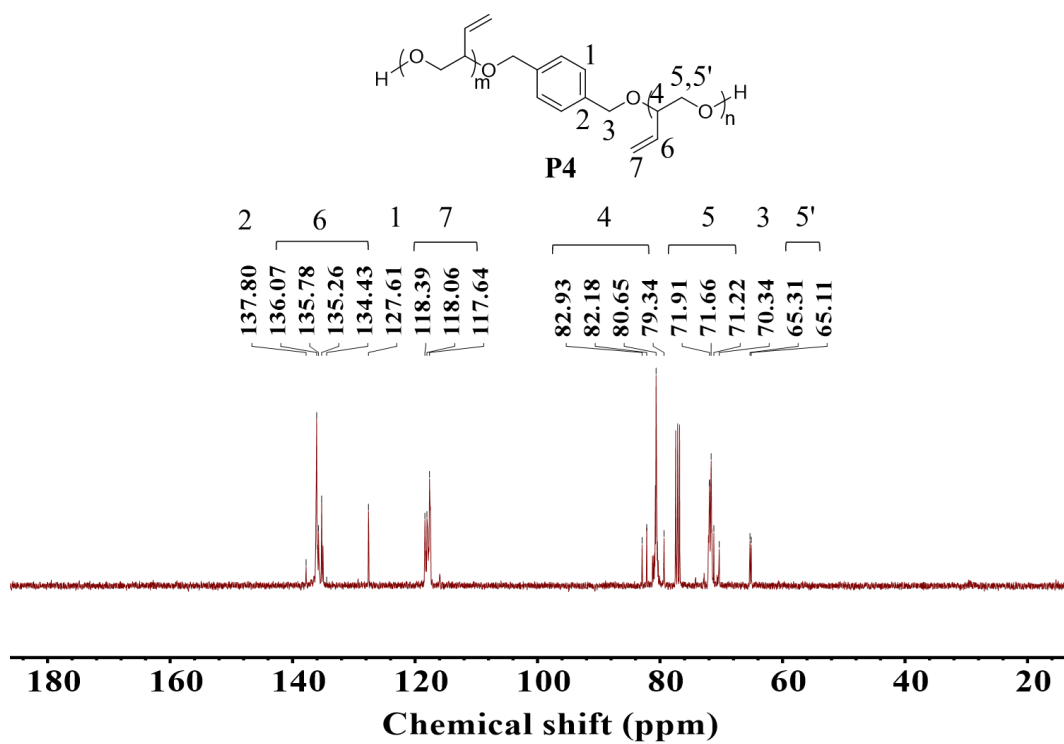

Figure S9. <sup>13</sup>C NMR spectrum of P4 in CDCl<sub>3</sub> (125 MHz).

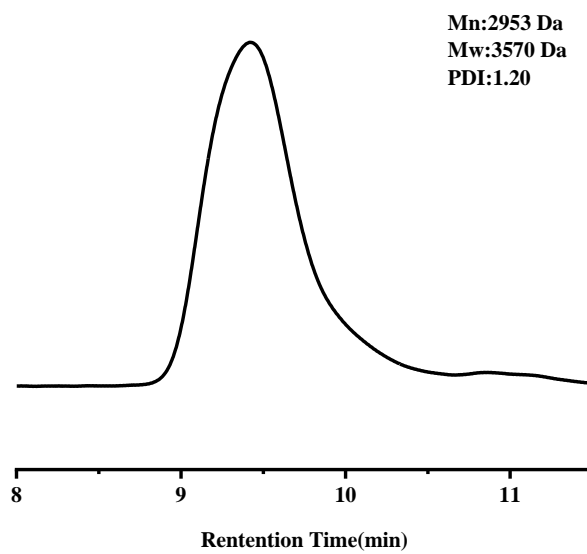

Figure S10. GPC chromatogram of P4.

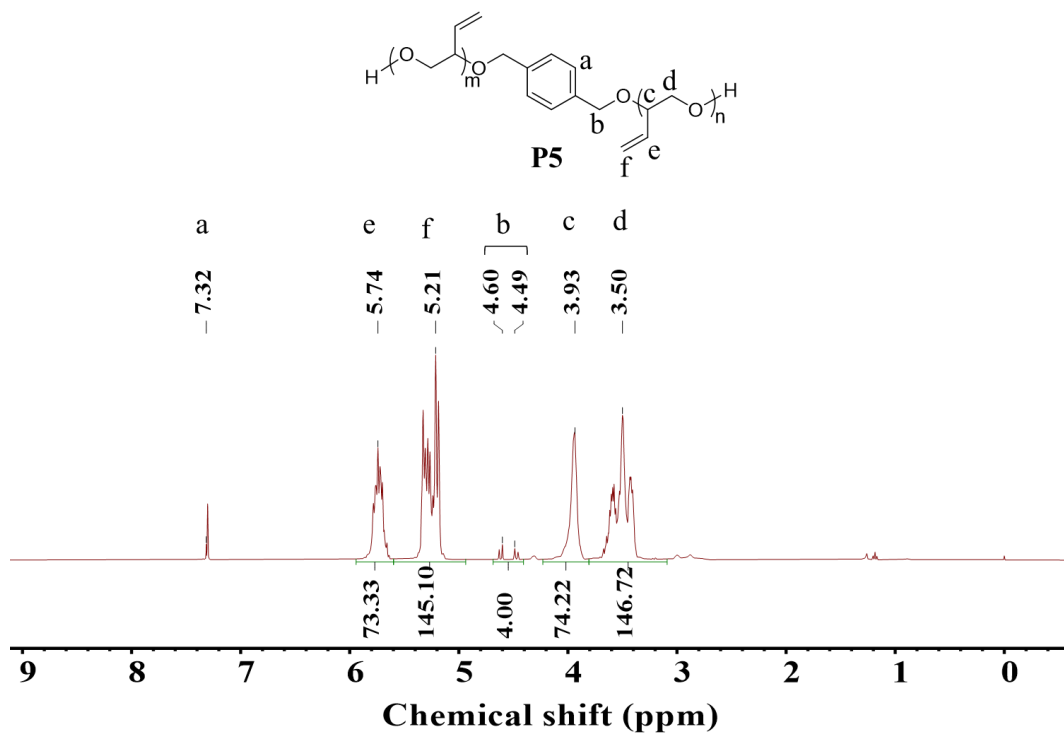

Figure S11.  $^1\text{H}$  NMR spectrum of **P5** in  $\text{CDCl}_3$  (400 MHz).

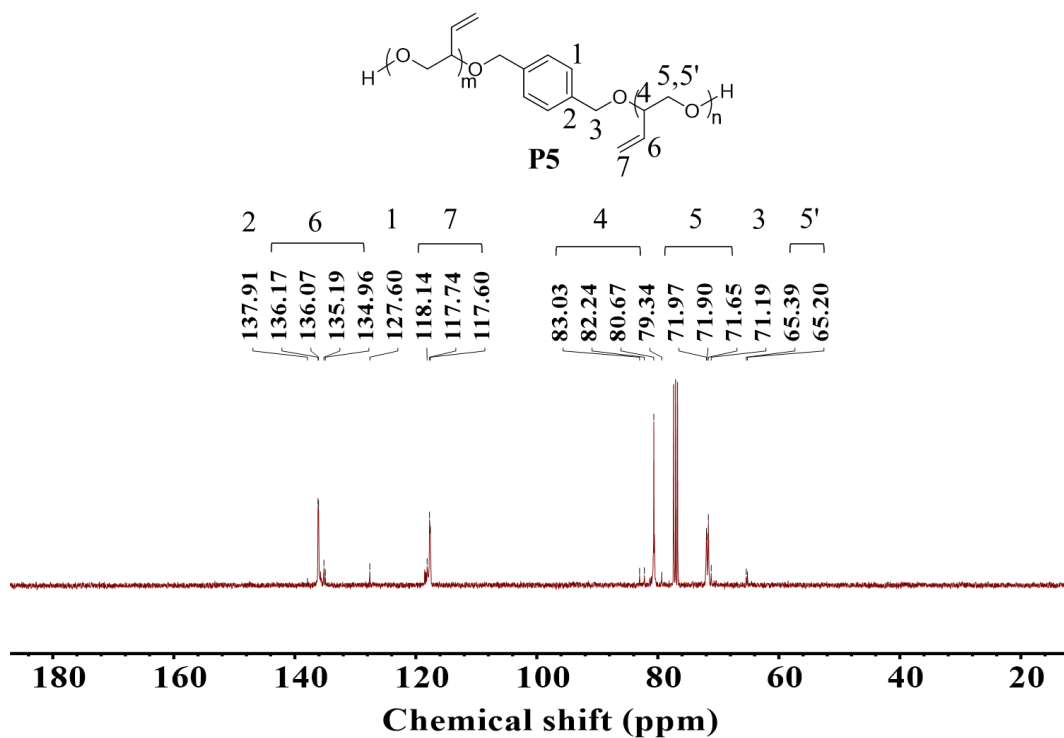

Figure S12.  $^{13}\text{C}$  NMR spectrum of **P5** in  $\text{CDCl}_3$  (125 MHz).

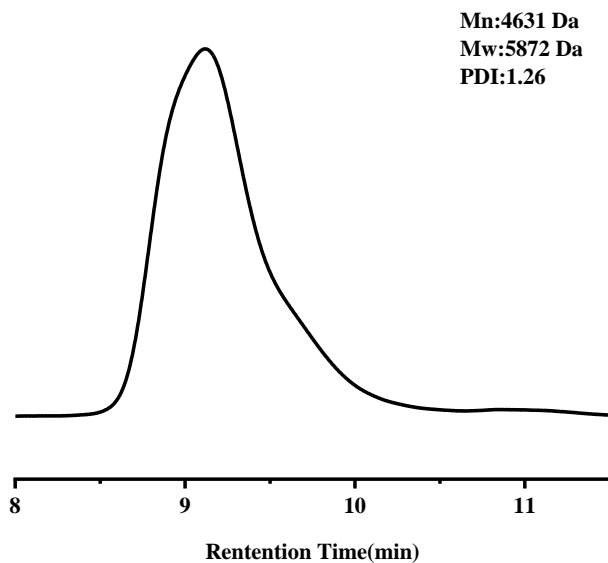

**Figure S13.** GPC chromatogram of **P5**.

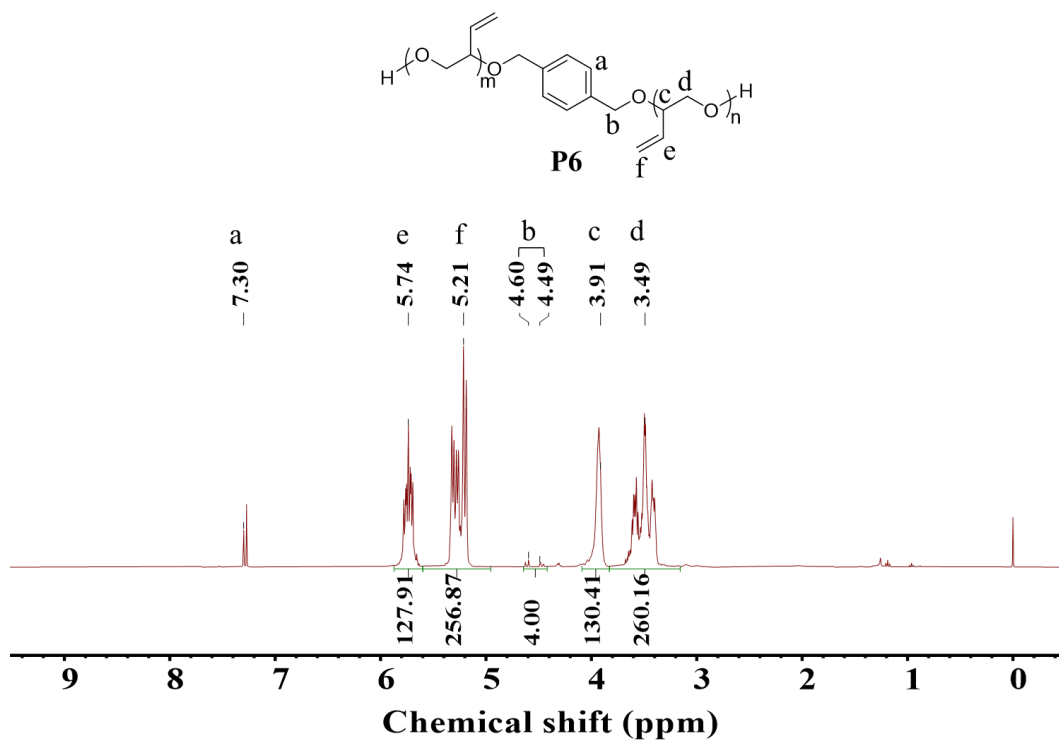

**Figure S14.**  $^1\text{H}$  NMR spectrum of **P6** in  $\text{CDCl}_3$  (400 MHz).



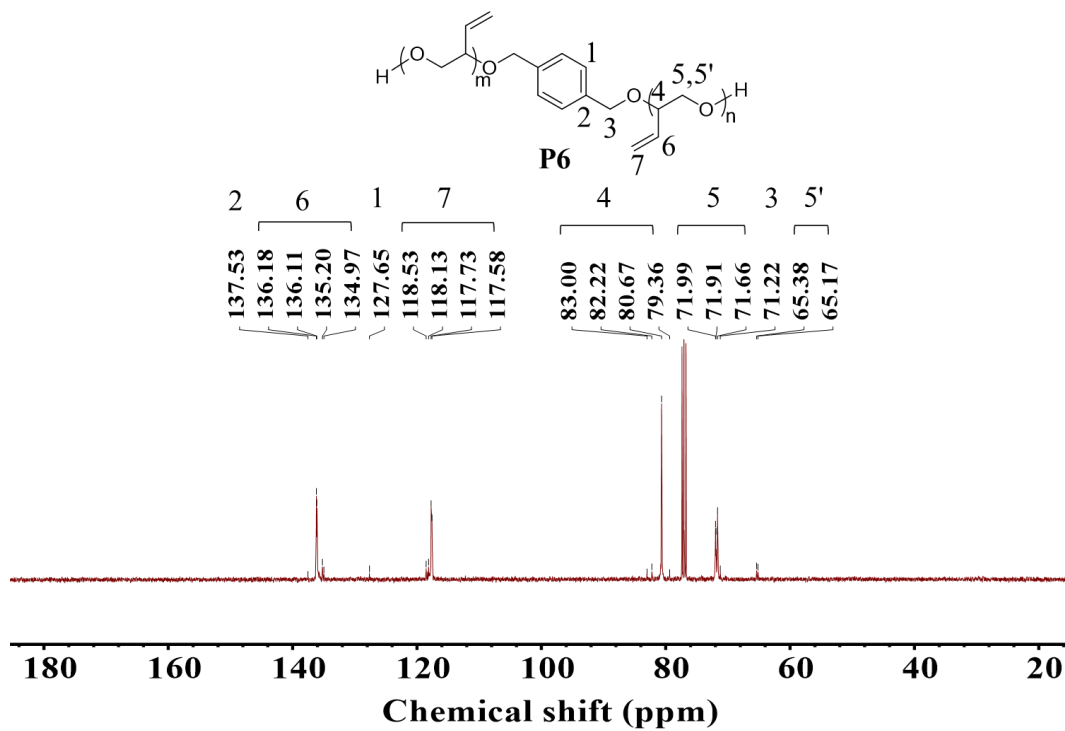

Figure S15.  $^{13}\text{C}$  NMR spectrum of P6 in  $\text{CDCl}_3$  (125 MHz).

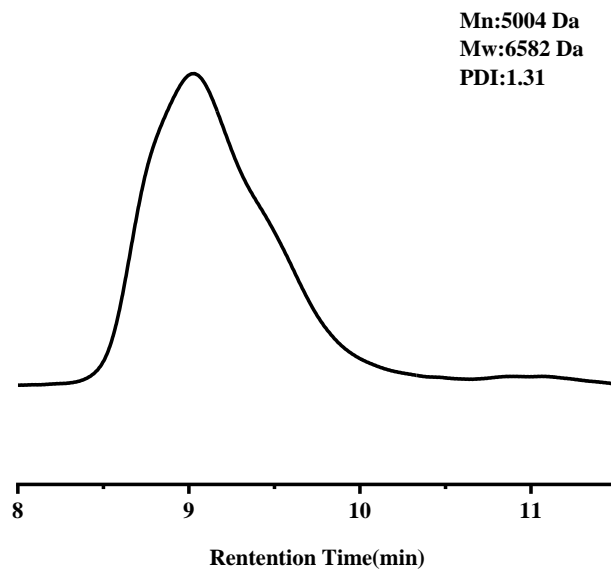

Figure S16. GPC chromatogram of P6.

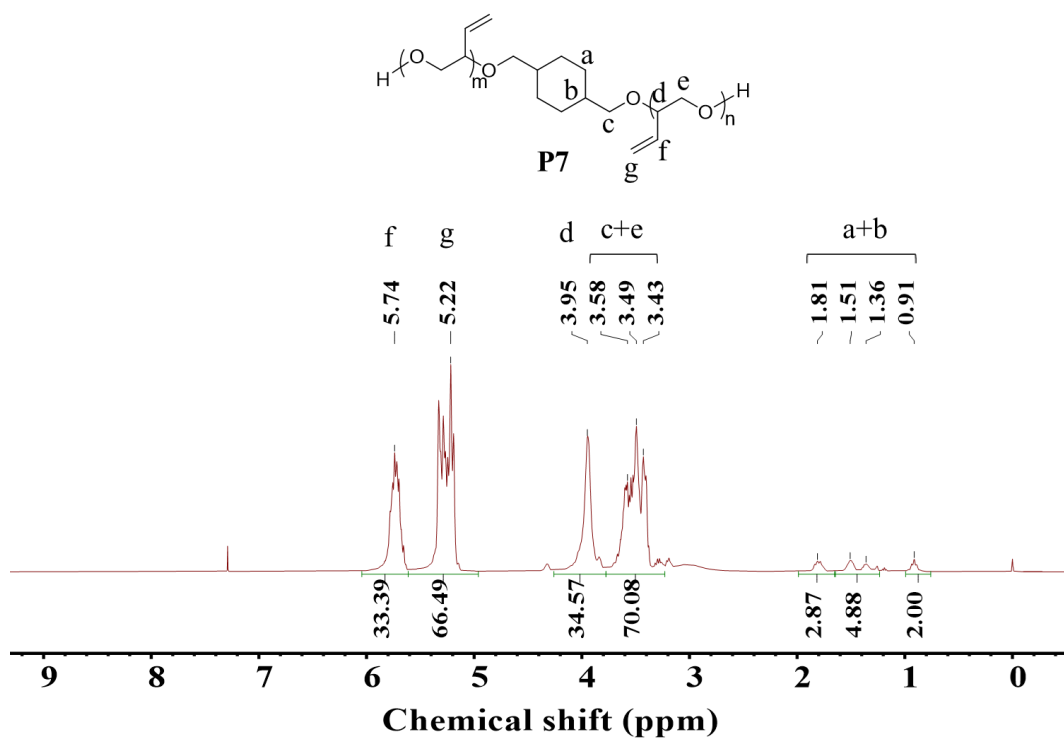

Figure S17.  $^1\text{H}$  NMR spectrum of P7 in  $\text{CDCl}_3$  (400 MHz).

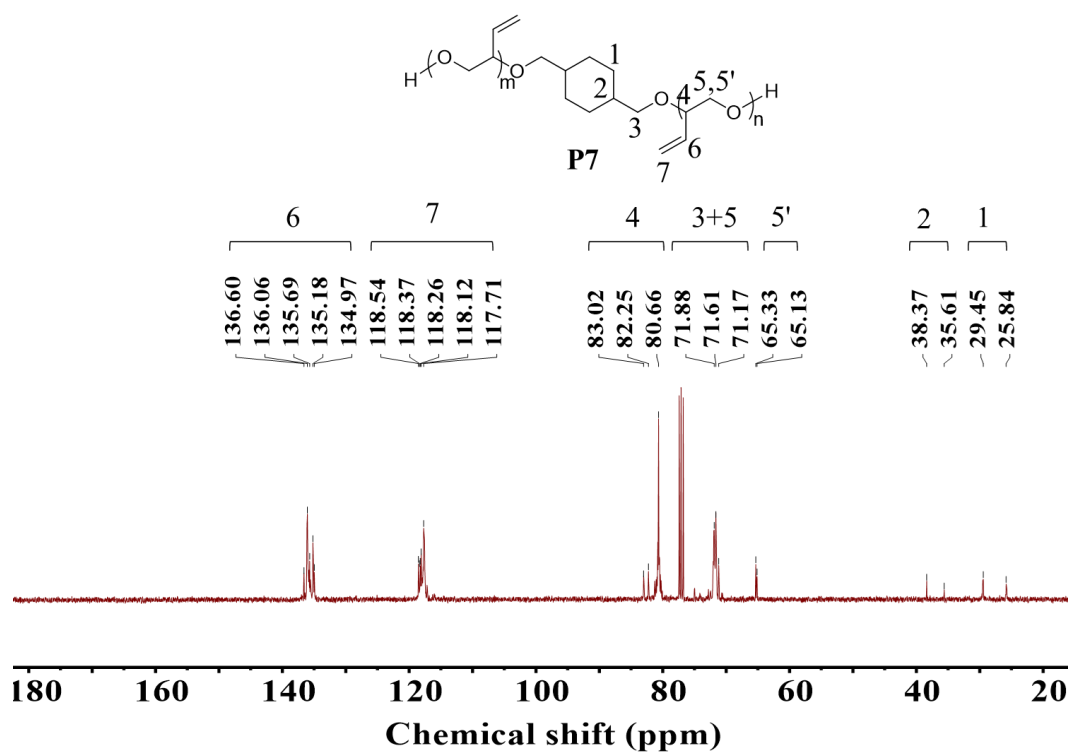

Figure S18.  $^{13}\text{C}$  NMR spectrum of P7 in  $\text{CDCl}_3$  (125 MHz).

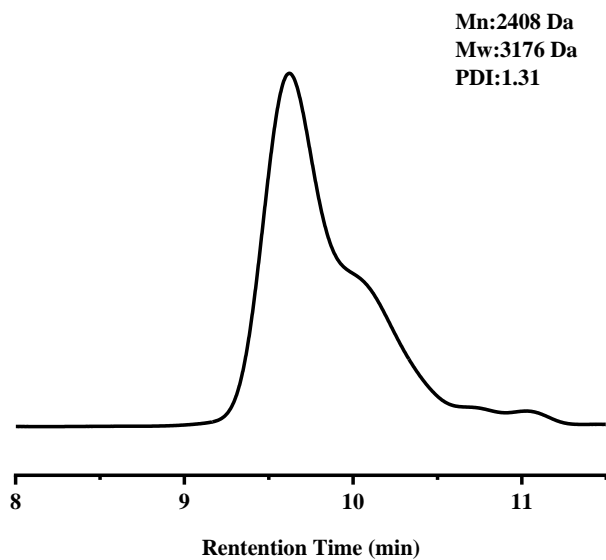

**Figure S19.** GPC chromatogram of **P7**.

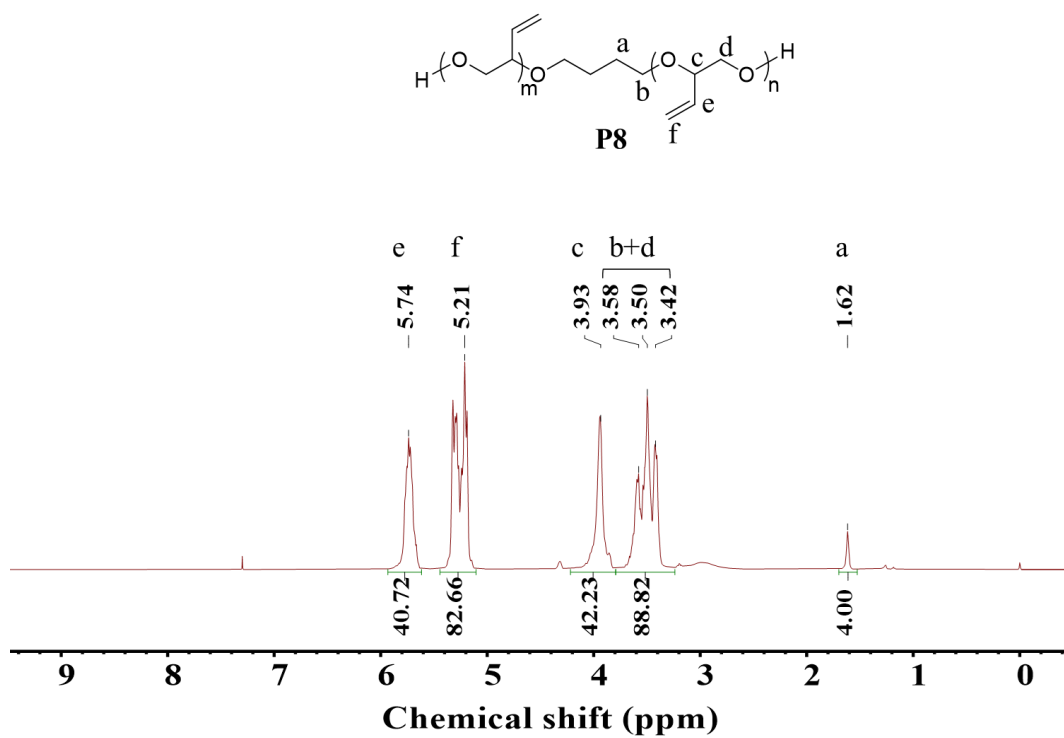

**Figure S20.**  $^1\text{H}$  NMR spectrum of **P8** in  $\text{CDCl}_3$  (400 MHz).

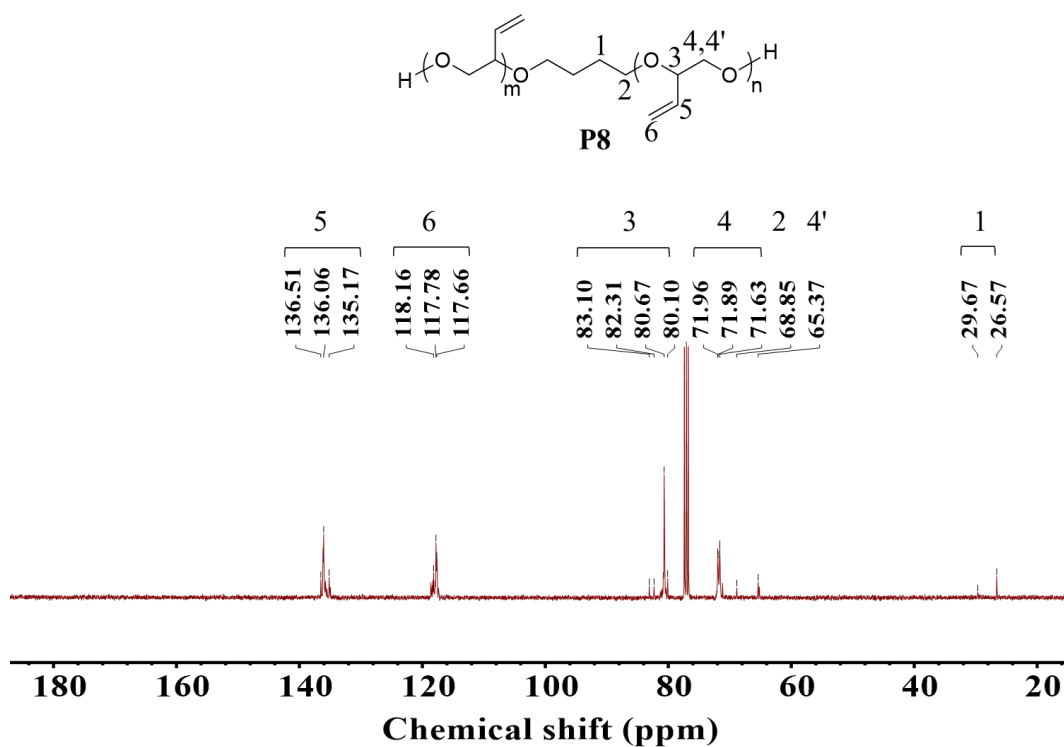

**Figure S21.**  $^{13}\text{C}$  NMR spectrum of **P8** in  $\text{CDCl}_3$  (125 MHz).

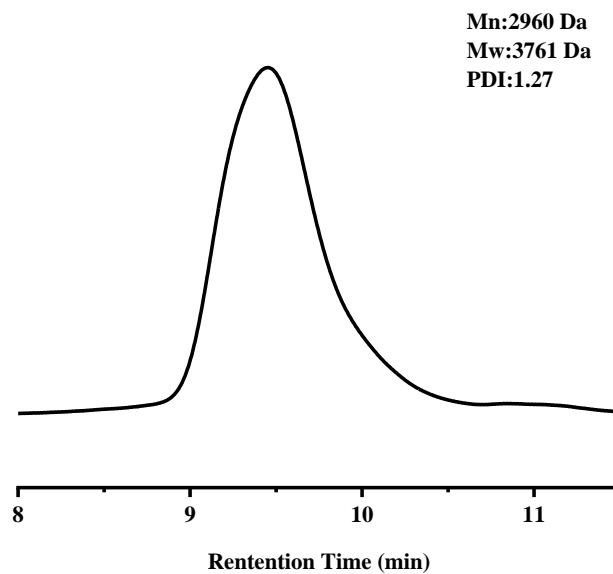

**Figure S22.** GPC chromatogram of **P8**.

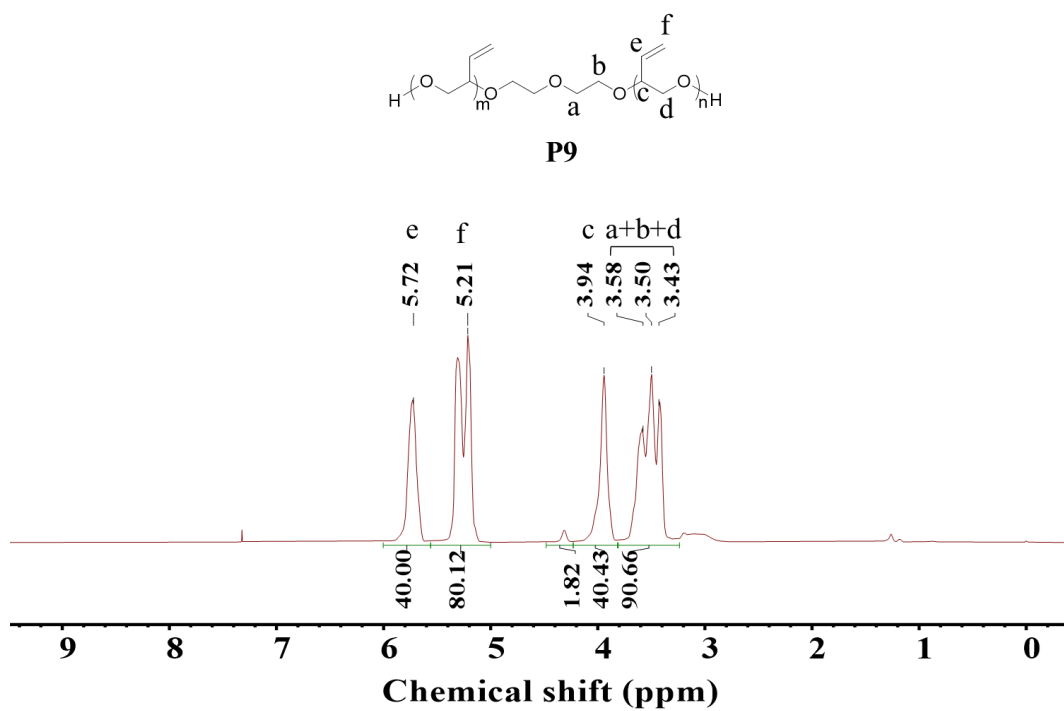

Figure S23.  $^1\text{H}$  NMR spectrum of **P9** in  $\text{CDCl}_3$  (400 MHz).

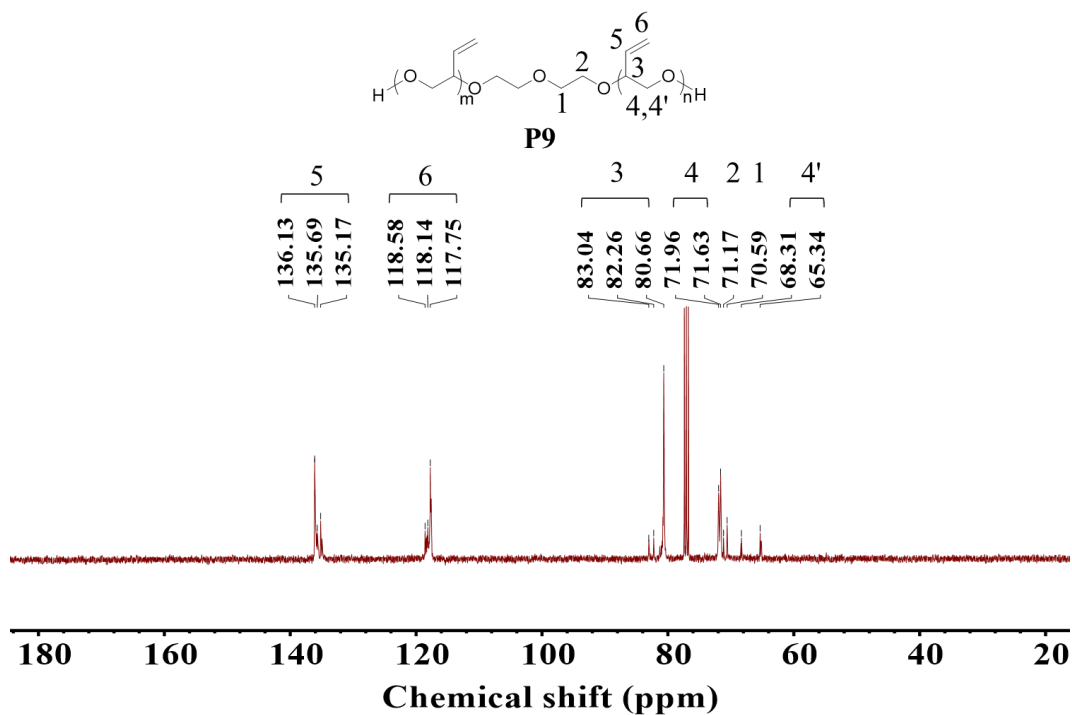

Figure S24.  $^{13}\text{C}$  NMR spectrum of **P9** in  $\text{CDCl}_3$  (125 MHz).

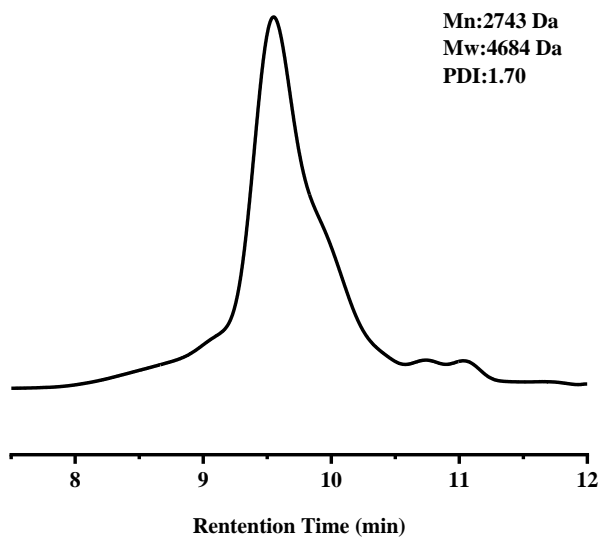

Figure S25. GPC chromatogram of P9.

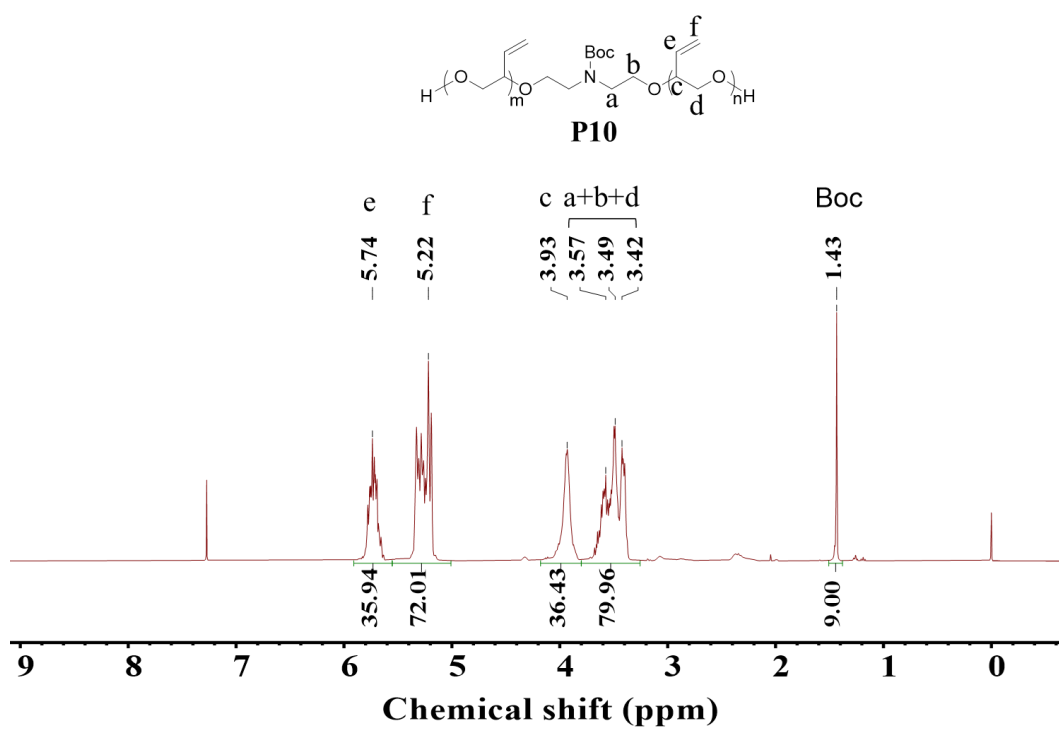

Figure S26.  $^1\text{H}$  NMR spectrum of P10 in  $\text{CDCl}_3$  (400 MHz).

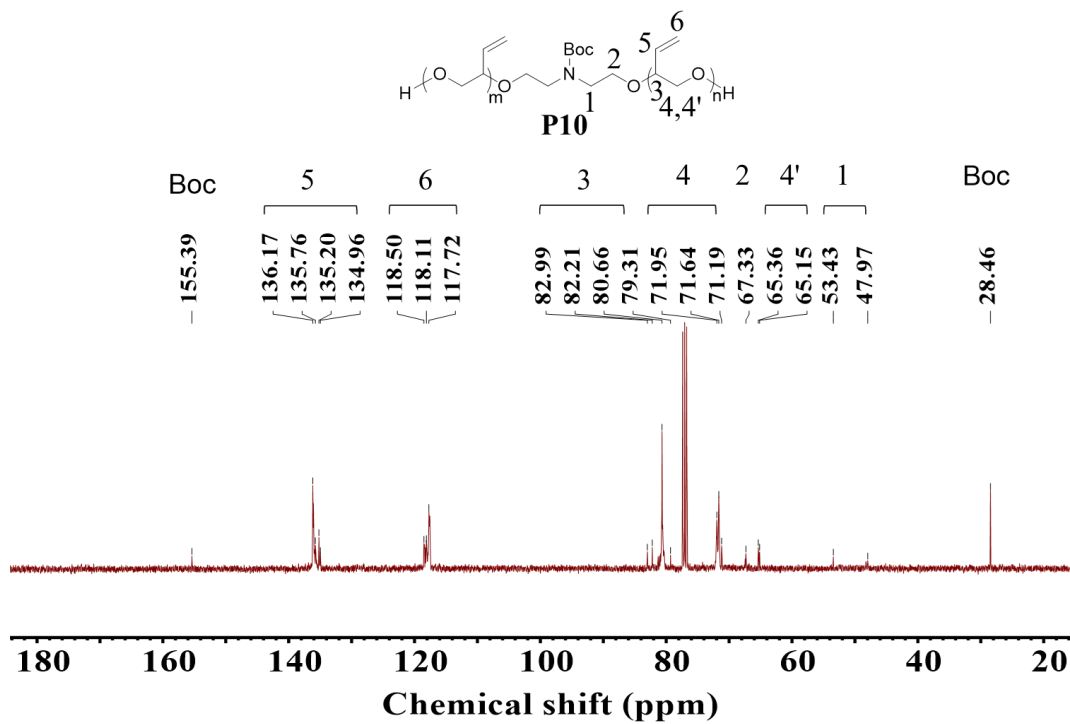

Figure S27. <sup>13</sup>C NMR spectrum of P10 in CDCl<sub>3</sub> (125 MHz).

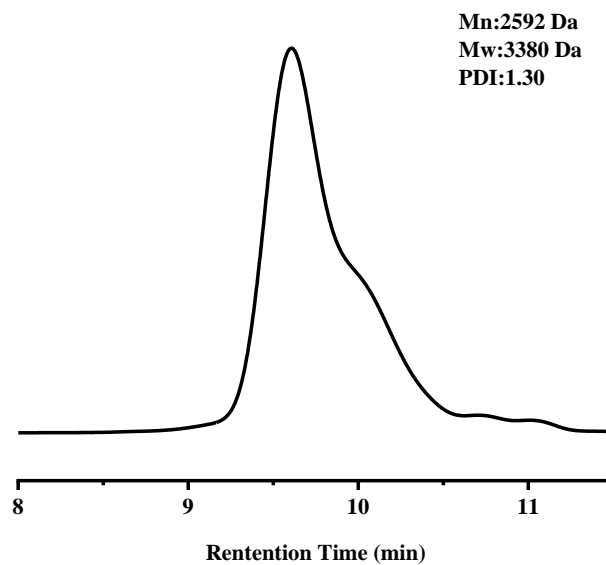

Figure S28. GPC chromatogram of P10.

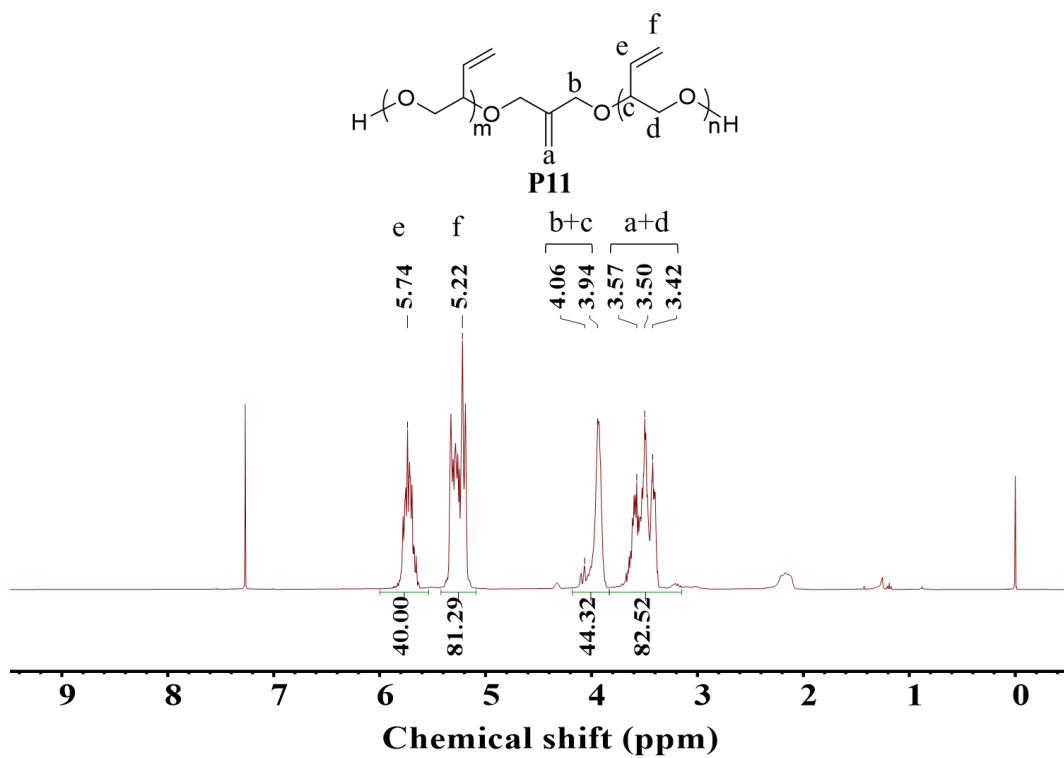

Figure S29.  $^1\text{H}$  NMR spectrum of P11 in  $\text{CDCl}_3$  (400 MHz).

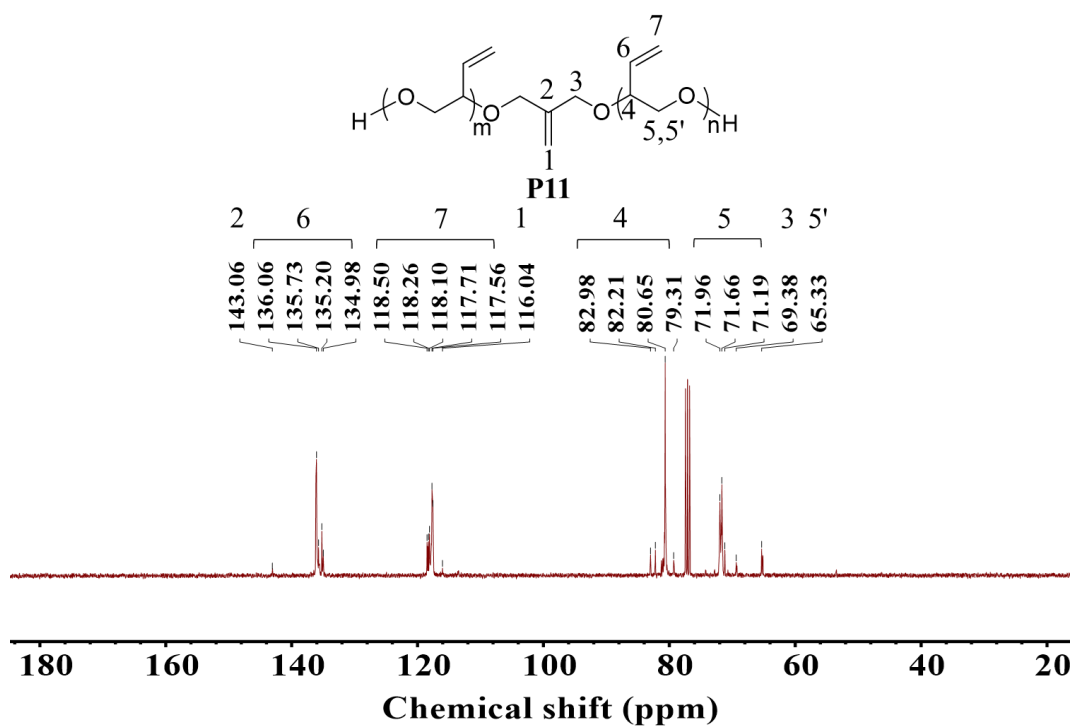

Figure S30.  $^{13}\text{C}$  NMR spectrum of P11 in  $\text{CDCl}_3$  (125 MHz).



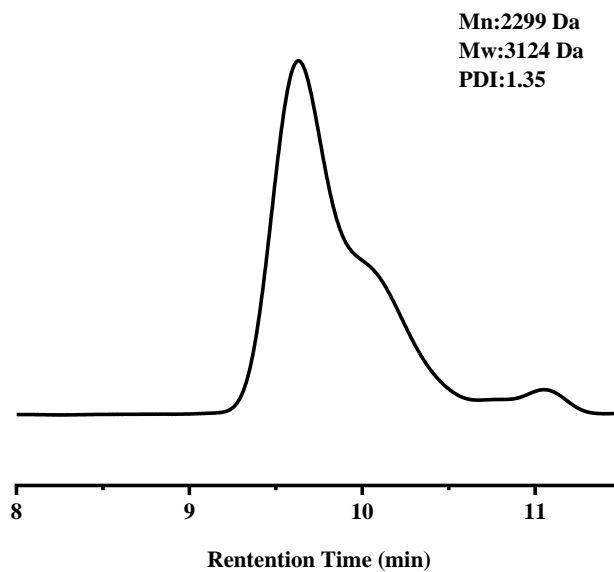

**Figure S31.** GPC chromatogram of P11.

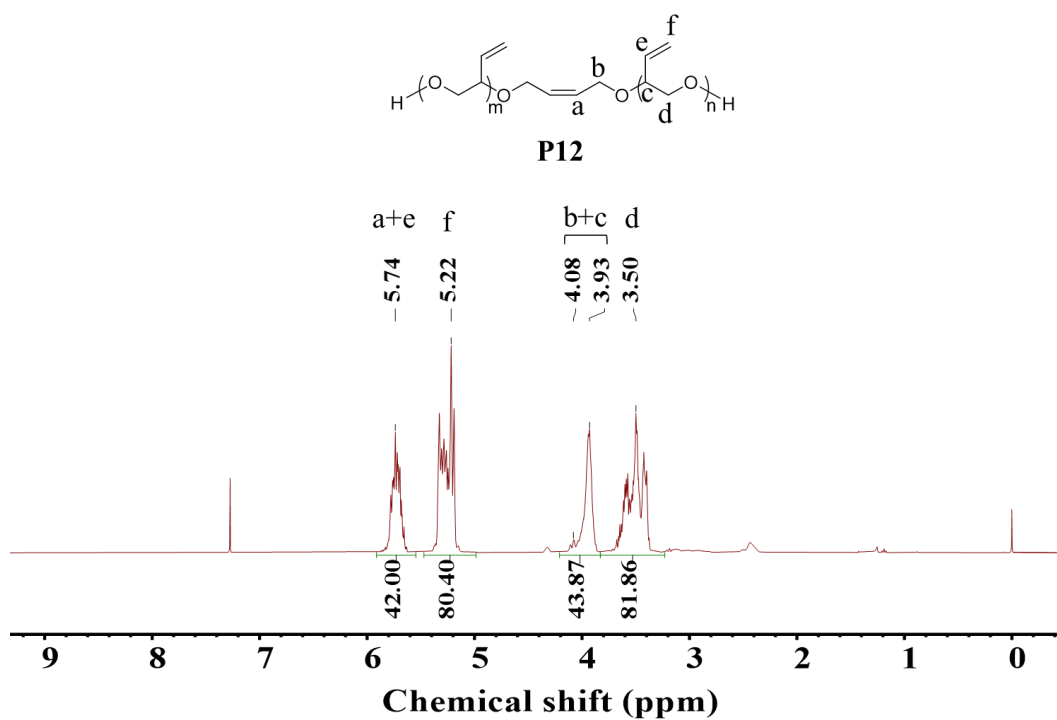

**Figure S32.**  $^1\text{H}$  NMR spectrum of P12 in  $\text{CDCl}_3$  (400 MHz).

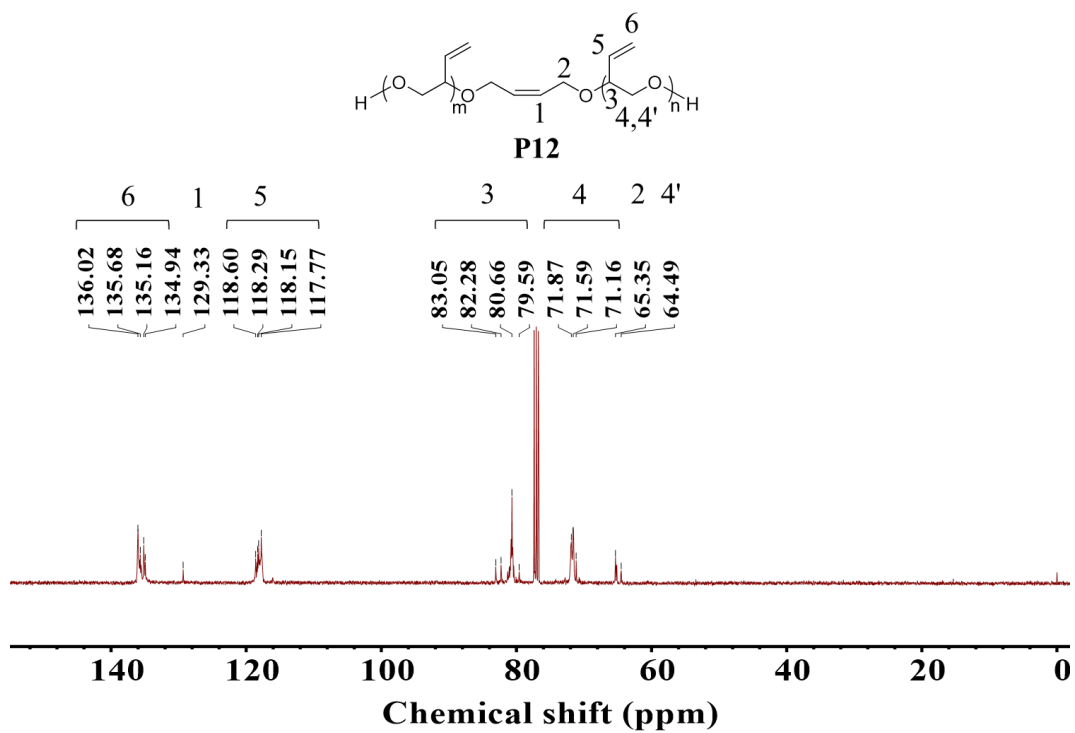

Figure S33.  $^{13}\text{C}$  NMR spectrum of P12 in  $\text{CDCl}_3$  (125 MHz).

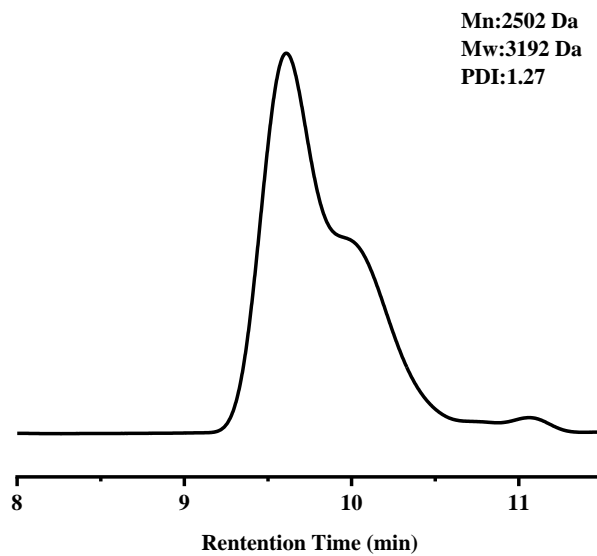

Figure S34. GPC chromatogram of P12.

## 7. Characterization of vinyl-functional thermoplastic polyurethane (VFTPU)

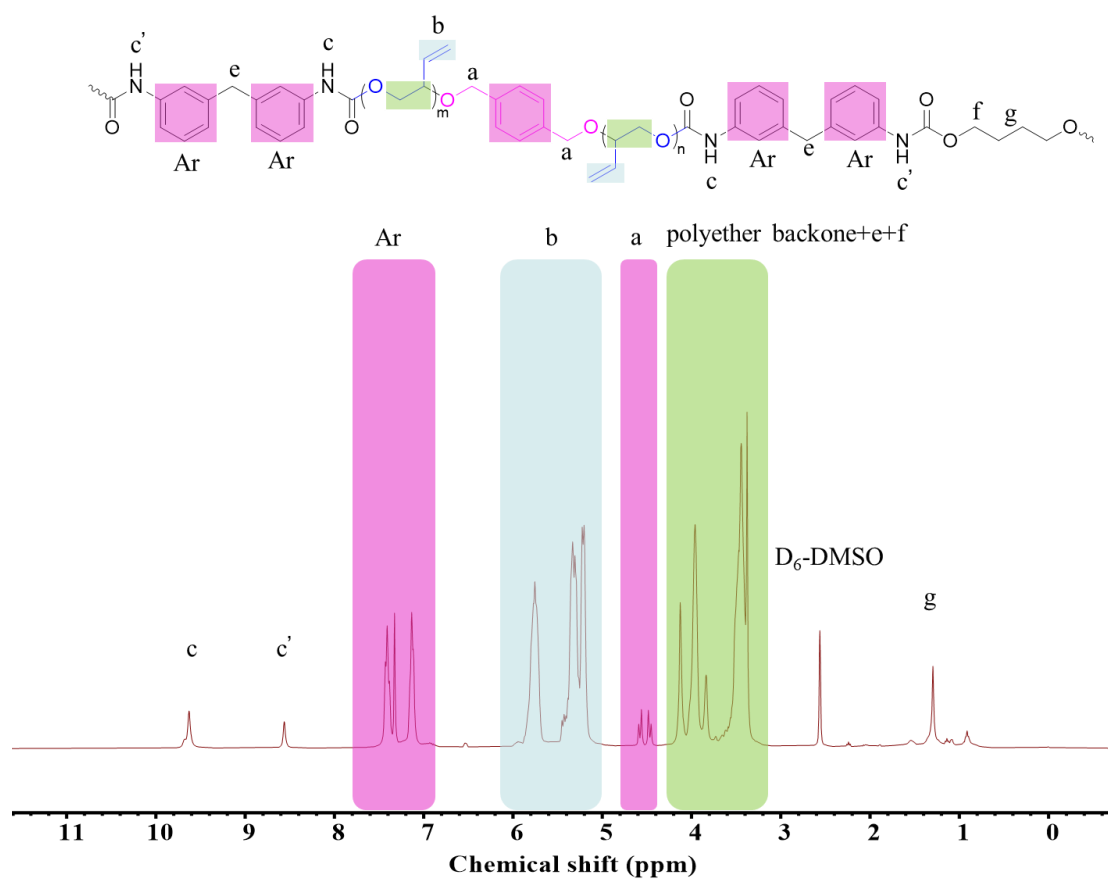

Figure S35.  $^1\text{H}$  NMR spectrum ( $\text{D}_6\text{-DMSO}$ , 400 MHz) of VFTPU

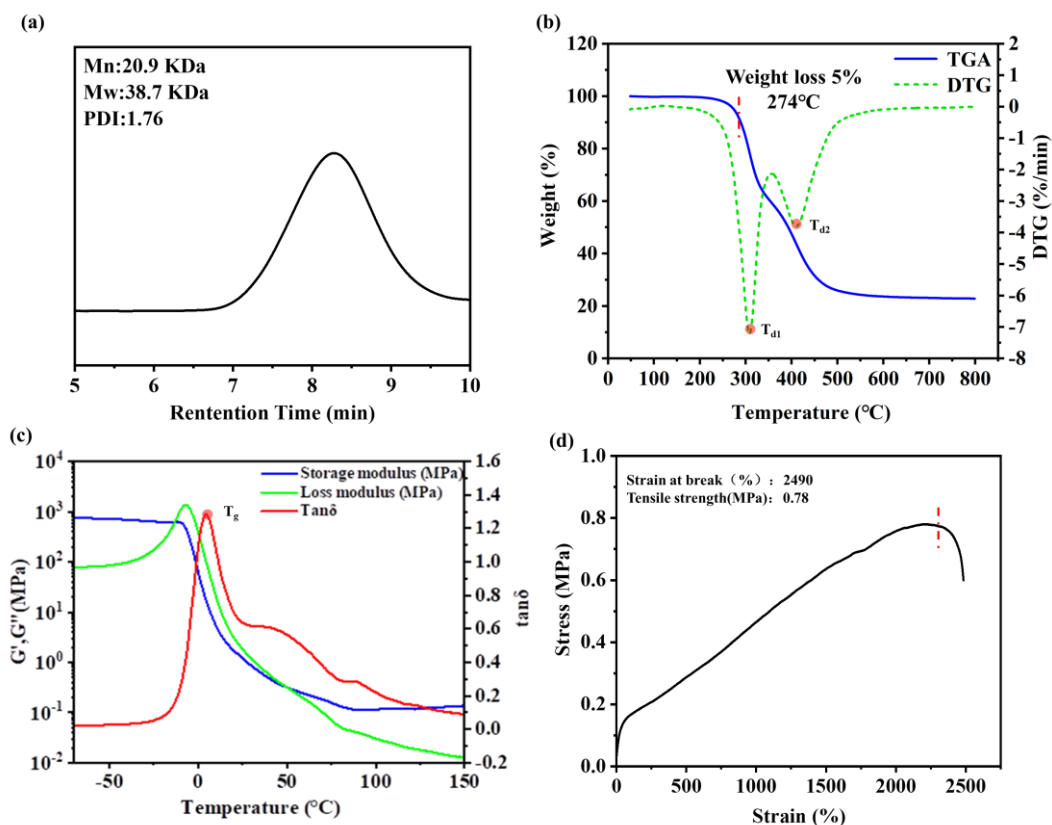

**Figure S36.** GPC chromatogram (a), thermogravimetric curve (b), dynamic mechanical analysis curve (c), and stress-strain curves (d) of VFTPU.

**Table S1.** Physical properties of VFTPU.

| sample | $T_{d1}^{[a]}$<br>(°C) | $T_{d2}^{[a]}$<br>(°C) | $T_g^{[b]}$<br>(°C) |
|--------|------------------------|------------------------|---------------------|
| VFTPU  | 310                    | 420                    | 4.5                 |

[a] measured by thermogravimetric analysis (TGA); [b] measured by dynamic mechanical analysis.

## 8. Optimization of the detailed polymerization conditions<sup>[a]</sup>

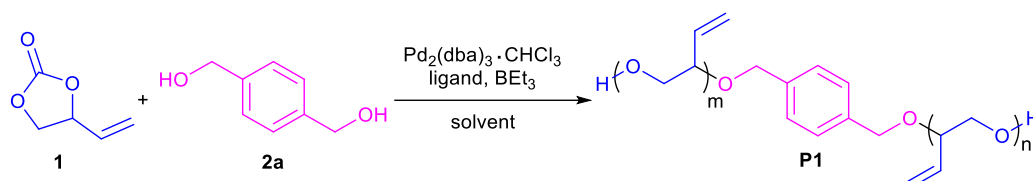

| entry             | ligand                    | solvent                         | Temp.<br>(°C)/time (h) | Yield (%) <sup>[b]</sup> |
|-------------------|---------------------------|---------------------------------|------------------------|--------------------------|
| 1                 | PPh <sub>3</sub>          | THF                             | 20/24                  | 0                        |
| 2                 | PCy <sub>3</sub>          | THF                             | 20/24                  | 0                        |
| 3                 | P(OPh) <sub>3</sub>       | THF                             | 20/24                  | 0                        |
| 4                 | P(2-furanyl) <sub>3</sub> | THF                             | 20/12                  | 81                       |
| 5                 | dppp                      | THF                             | 20/12                  | 5                        |
| 6                 | dppb                      | THF                             | 20/12                  | 20                       |
| 7                 | BINAP                     | THF                             | 20/12                  | 80                       |
| 8                 | DPEphos                   | THF                             | 20/2                   | 86                       |
| 9                 | DPEphos                   | 1,4-dioxane                     | 20/2                   | 61                       |
| 10                | DPEphos                   | MTBE                            | 20/2                   | 75                       |
| 11                | DPEphos                   | toluene                         | 20/2                   | 78                       |
| 12                | DPEphos                   | CH <sub>2</sub> Cl <sub>2</sub> | 20/2                   | 73                       |
| 13                | DPEphos                   | CH <sub>3</sub> CN              | 20/2                   | 76                       |
| 14                | DPEphos                   | THF                             | 10/2                   | 95                       |
| 15                | DPEphos                   | THF                             | 30/2                   | 89                       |
| 16                | DPEphos                   | THF                             | 50/2                   | 91                       |
| 17                | DPEphos                   | THF                             | 70/2                   | 92                       |
| 18 <sup>[c]</sup> | DPEphos                   | THF                             | 10/2                   | 95                       |
| 19 <sup>[d]</sup> | DPEphos                   | THF                             | 10/12                  | 91                       |
| 20 <sup>[e]</sup> | DPEphos                   | THF                             | 10/24                  | 45                       |

[a] Reaction conditions: **1** (1.0 mmol, 10 equiv.), **2a** (0.1 mmol, 1 equiv.), Pd<sub>2</sub>(dba)<sub>3</sub>·CHCl<sub>3</sub> (0.2 mol% for **1**), ligand (0.8 mol% for monophosphines; 0.4 mol% for bisphosphines), BEt<sub>3</sub> (0.4 mol% for **1**), solvent (1.0 mL). [b] Isolated yields. [c] The reaction carried out using Pd<sub>2</sub>(dba)<sub>3</sub>·CHCl<sub>3</sub> (0.15 mol% for **1**), DPEphos (0.3 mol% for **1**) and BEt<sub>3</sub> (0.3 mol% for **1**) under otherwise identical conditions. [d] The reaction carried out using Pd<sub>2</sub>(dba)<sub>3</sub>·CHCl<sub>3</sub> (0.1 mol% for **1**), DPEphos (0.2 mol% for **1**) and BEt<sub>3</sub> (0.2 mol% for **1**) under otherwise identical conditions. [e] The reaction carried out using Pd<sub>2</sub>(dba)<sub>3</sub>·CHCl<sub>3</sub> (0.05 mol% for **1**), DPEphos (0.1 mol% for **1**) and BEt<sub>3</sub> (0.1 mol% for **1**) under otherwise identical conditions. BINAP, 2,2'-bis(diphenylphosphanyl)-1,1'-binaphthalene; dppb, 1,4-bis(diphenylphosphanyl)butane; dppp, 1,3-bis(diphenylphosphanyl)propane; MTBE, methyl tert-butyl ether.
